# Supplementary material for: Los diésel se purifican
Source: MDPI journal article supplement (doi:10.3390/nu14102077), 2007-01-01
Supplement: s1 [file s1]

## **Supporting Information**

**Table S1** Differentially expressed proteins of macrophages treated with acetaminophen (APAP) in the presence or absence of polydatin (HU).

**Table S2** Localization of differentially expressed proteins in macrophages

### **Figure captions**

**Figure S1 MTT assay for cell viability.** Effect of acetaminophen (APAP) and polydatin on the survival rate of RAW264.7 cells.

**Figure S2** Gene ontology classification (ANOVA) analysis of differentially expressed proteins of macrophages treated with acetaminophen (APAP). (A) APAP100 vs control group, (B) APAP500 vs control group.

Table S1

**Table S1** Differentially expressed proteins of macrophages treated with acetaminophen (APAP) or polydatin

| Protein<br>Accession | Gene<br>Name | Control-<br>1 | Control-<br>2 | Control-<br>3 | APAP<br>100-1 | APAP<br>100-2 | APAP<br>100-3 | APAP<br>500-1 | APAP<br>500-2 | APAP<br>500-3 | APAP-<br>HU-1 | APAP-<br>HU-2 | APAP-<br>HU-3 | Adjust pvalue |
|----------------------|--------------|---------------|---------------|---------------|---------------|---------------|---------------|---------------|---------------|---------------|---------------|---------------|---------------|---------------|
| Q8BTM8               | Flna         | 117.1         | 111.4         | 116           | 98.5          | 103.3         | 103           | 87.3          | 87.2          | 85.9          | 97.4          | 98.1          | 94.6          | 5.15026E-05   |
| E9PVX6               | Mki67        | 110.7         | 106.5         | 108.3         | 130.7         | 126.6         | 128.8         | 61.1          | 59.4          | 63.6          | 98.6          | 109           | 96.7          | 1.70253E-05   |
| P16546               | Sptan1       | 99.8          | 102           | 105.5         | 109.3         | 106.9         | 107.8         | 89.3          | 87.2          | 90.2          | 100.5         | 100.1         | 101.5         | 8.70273E-05   |
| P09103               | P4hb         | 98.4          | 103.2         | 104.5         | 86.4          | 92.1          | 91.6          | 116.8         | 116.1         | 113.5         | 92.6          | 90.9          | 94            | 8.47959E-05   |
| P23116               | Eif3a        | 105.8         | 103.7         | 107.7         | 106.1         | 106.6         | 106.9         | 87.4          | 84            | 90.4          | 100.7         | 100.2         | 100.2         | 7.48501E-05   |
| Q6P5E4               | Uggt1        | 85.7          | 83.9          | 88.2          | 93.3          | 97.4          | 91.5          | 120.8         | 127.3         | 123.8         | 95.8          | 94.9          | 97.5          | 2.47248E-05   |
| Q8CAQ8               | Immt         | 86.1          | 87.8          | 92            | 94.5          | 97.4          | 95.1          | 117.1         | 117.2         | 119.1         | 98.4          | 94            | 101.3         | 6.57115E-05   |
| Q8VHX6               | Flnc         | 101.5         | 100           | 101.2         | 104.7         | 106.2         | 106.9         | 87.1          | 88.7          | 88.6          | 105.1         | 104.7         | 105.3         | 5.14414E-06   |
| Q03265               | Atp5fla      | 82.8          | 84            | 85.5          | 97.2          | 96.9          | 91.2          | 120.5         | 123.7         | 120.3         | 101.5         | 96.1          | 100.2         | 2.61375E-05   |
| Q01320               | Top2a        | 86.3          | 79.3          | 83.4          | 119.3         | 128.2         | 124.1         | 83.9          | 88.5          | 87.6          | 104           | 111.8         | 103.7         | 6.33677E-05   |
| Q8BFR5               | Tufm         | 94            | 92.2          | 96.5          | 90            | 92.3          | 90            | 118.5         | 126.4         | 117.7         | 94.5          | 93.7          | 94.2          | 5.24129E-05   |
| Q91YQ5               | Rpn1         | 90.1          | 86.5          | 90.6          | 97.2          | 99.3          | 93.9          | 112.7         | 119.7         | 116.9         | 97.9          | 96            | 99.3          | 9.6261E-05    |
| Q3U0V1               | Khsrp        | 119.3         | 113.6         | 115.8         | 101.9         | 105.1         | 105.4         | 86.8          | 82            | 85.1          | 95.1          | 97.5          | 92.5          | 4.29071E-05   |
| Q8CGK3               | Lonp1        | 91.9          | 86.3          | 90.9          | 88.2          | 94.8          | 88.1          | 125.1         | 130.7         | 124.9         | 92.4          | 93.1          | 93.5          | 2.91578E-05   |
| P49710               | Hcls1        | 99.5          | 98.5          | 98.6          | 122.2         | 111.7         | 116.2         | 76.8          | 70.4          | 80.5          | 108.7         | 107.9         | 109.1         | 7.07414E-05   |
| P26443               | Glud1        | 92.7          | 86.3          | 92.3          | 88.4          | 93.4          | 91.2          | 124.1         | 128.1         | 118.3         | 97.1          | 94.7          | 93.2          | 8.13629E-05   |
| Q9CQN1               | Trap1        | 91.5          | 87.7          | 92.9          | 87.2          | 97.1          | 90.7          | 122.7         | 129.4         | 122.4         | 91.2          | 94.1          | 93.1          | 7.48501E-05   |
| Q7TMK9               | Syncrip      | 111.7         | 111.8         | 118.7         | 99            | 101.5         | 100.5         | 88.6          | 89.1          | 88            | 97.9          | 97.1          | 96.1          | 6.46683E-05   |
| Q922J3               | Clip1        | 102.1         | 100.4         | 102.8         | 108.4         | 105.1         | 106.3         | 90.1          | 89.8          | 92.5          | 100.3         | 101.4         | 100.8         | 5.49417E-05   |

| Protein<br>Accession | Gene<br>Name | Control-<br>1 | Control-<br>2 | Control-<br>3 | APAP<br>100-1 | APAP<br>100-2 | APAP<br>100-3 | APAP<br>500-1 | APAP<br>500-2 | APAP<br>500-3 | APAP-<br>HU-1 | APAP-<br>HU-2 | APAP-<br>HU-3 | Adjust pvalue |
|----------------------|--------------|---------------|---------------|---------------|---------------|---------------|---------------|---------------|---------------|---------------|---------------|---------------|---------------|---------------|
| Q9QZQ1               | Afdn         | 109.9         | 106.6         | 109.6         | 102.6         | 100.8         | 103.6         | 93.3          | 89.9          | 93            | 96            | 98.2          | 96.5          | 9.07385E-05   |
| P30416               | Fkbp4        | 118.6         | 117           | 119           | 97.4          | 100           | 101.2         | 88.4          | 89.9          | 88.3          | 91.2          | 97.3          | 91.6          | 2.76658E-05   |
| P61979               | Hnrnpk       | 107           | 112.6         | 110.4         | 113.5         | 105.3         | 106.8         | 79.2          | 77.7          | 82.7          | 101.5         | 103.4         | 99.7          | 8.29845E-05   |
| P18242               | Ctsd         | 77.6          | 81.7          | 78.7          | 101.2         | 93.8          | 90.5          | 115.5         | 121.3         | 116.1         | 110.9         | 104.7         | 108.1         | 8.86508E-05   |
| Q8BG05               | Hnrnpa3      | 110.1         | 109.2         | 109.1         | 104.4         | 101.1         | 101.1         | 87.2          | 90            | 93.2          | 97.8          | 99            | 97.7          | 9.92874E-05   |
| Q99MR6               | Srrt         | 100.9         | 104.9         | 104.5         | 105.6         | 106.7         | 109.8         | 87.3          | 85.9          | 88.3          | 102.9         | 101.8         | 101.3         | 5.13311E-05   |
| P08249               | Mdh2         | 91            | 89.1          | 87.4          | 85.4          | 86.2          | 89.5          | 131.5         | 133.2         | 122.6         | 93.8          | 94.9          | 95.3          | 2.83047E-05   |
| Q9EQP2               | Ehd4         | 104.4         | 108.8         | 108.7         | 106.7         | 104.2         | 106.1         | 84.8          | 84.9          | 85.7          | 100.7         | 101.6         | 103.4         | 2.56761E-05   |
| Q9Z2I8               | Suclg2       | 86            | 91            | 91.6          | 94.8          | 89.3          | 89.1          | 120.1         | 124.3         | 118.9         | 99.9          | 94.4          | 100.7         | 7.93899E-05   |
| O70318               | Epb4112      | 105.8         | 106.6         | 107.5         | 103.3         | 103           | 104.4         | 92.4          | 93.4          | 95.5          | 96.2          | 97.2          | 94.7          | 4.82617E-05   |
| Q8VIJ6               | Sfpq         | 107.6         | 105.9         | 108.8         | 108.1         | 108.1         | 107.8         | 83.2          | 81            | 86.8          | 101.2         | 99.9          | 101.7         | 2.24605E-05   |
| Q8BHN3               | Ganab        | 93.8          | 90.8          | 94.8          | 90.1          | 92.9          | 91.5          | 117.9         | 123           | 115.1         | 95            | 96.6          | 98.5          | 5.91773E-05   |
| Q60597               | Ogdh         | 93.4          | 87.2          | 86.7          | 79.4          | 88.1          | 88.3          | 136.9         | 138.3         | 125.9         | 89.3          | 94.8          | 91.5          | 7.46422E-05   |
| Q04447               | Ckb          | 111.6         | 118.4         | 117.3         | 98.4          | 97.2          | 100.6         | 87.8          | 91.1          | 90.3          | 93.7          | 97.7          | 95.7          | 7.91683E-05   |
| Q9Z1Z2               | Strap        | 111.3         | 110.6         | 110.3         | 100.5         | 100.2         | 98.6          | 89.9          | 94.3          | 90.4          | 96.9          | 100.4         | 96.6          | 7.39442E-05   |
| Q6A068               | Cdc5l        | 100.7         | 102.4         | 105.5         | 110.7         | 105.2         | 107.5         | 86.1          | 86            | 87.4          | 103.4         | 103.5         | 101.6         | 7.1825E-05    |
| P10605               | Ctsb         | 108.1         | 109.5         | 108.3         | 98.4          | 95.9          | 98.2          | 93.4          | 92.4          | 91.8          | 99.7          | 101.6         | 102.6         | 3.27424E-05   |
| Q99L45               | Eif2s2       | 106.5         | 106.7         | 108.1         | 98.6          | 95.7          | 99.4          | 93.9          | 94.7          | 93            | 102.4         | 100.5         | 100.7         | 9.52528E-05   |
| P30681               | Hmgb2        | 106.8         | 109.2         | 108.6         | 123.7         | 117.7         | 122.2         | 63.8          | 59.5          | 70.3          | 107.5         | 107.9         | 102.9         | 1.96502E-05   |
| P47738               | Aldh2        | 91.1          | 85.4          | 89.8          | 82.9          | 88.1          | 88.9          | 131.1         | 135.5         | 124.7         | 93.1          | 95.2          | 94.2          | 3.49561E-05   |
| Q99LC5               | Etfa         | 87.8          | 90.8          | 88.6          | 93.5          | 89.5          | 88.5          | 118.2         | 126.9         | 121.4         | 99.8          | 95.2          | 99.9          | 5.38289E-05   |
| Q8QZT1               | Acat1        | 90.7          | 84.9          | 91.2          | 85.9          | 91.9          | 90.3          | 127.8         | 132.7         | 123.1         | 93.4          | 93.8          | 94.3          | 4.08553E-05   |
| Q8BWT1               | Acaa2        | 90.3          | 86.2          | 92.1          | 84.9          | 87.2          | 87            | 129.8         | 137.9         | 124.2         | 92.4          | 92.4          | 95.7          | 4.8877E-05    |

| Protein<br>Accession | Gene<br>Name | Control-<br>1 | Control-<br>2 | Control-<br>3 | APAP<br>100-1 | APAP<br>100-2 | APAP<br>100-3 | APAP<br>500-1 | APAP<br>500-2 | APAP<br>500-3 | APAP-<br>HU-1 | APAP-<br>HU-2 | APAP-<br>HU-3 | Adjust pvalue |
|----------------------|--------------|---------------|---------------|---------------|---------------|---------------|---------------|---------------|---------------|---------------|---------------|---------------|---------------|---------------|
| Q8K1B8               | Fermt3       | 116.4         | 111           | 114.8         | 99.8          | 104.5         | 100.3         | 85            | 86.1          | 85.7          | 96.4          | 101.9         | 98.1          | 6.4123E-05    |
| Q60932               | Vdac1        | 80            | 80.3          | 81.9          | 99.3          | 93.7          | 91.9          | 122.8         | 129           | 120.4         | 103.9         | 94.1          | 102.6         | 8.76837E-05   |
| Q6A028               | Swap70       | 112.4         | 116.7         | 115.3         | 102           | 105           | 101.8         | 85.4          | 84.3          | 87.4          | 94.3          | 99.9          | 95.5          | 4.09455E-05   |
| Q9CVB6               | Arpc2        | 106           | 108.5         | 107.5         | 103.5         | 105           | 100.5         | 88.3          | 88.5          | 90.1          | 99.7          | 102.3         | 100.1         | 5.85888E-05   |
| Q6GQT9               | Nomo1        | 88.3          | 85.3          | 89.9          | 89.8          | 94.4          | 90.7          | 123.5         | 129.8         | 120           | 97.4          | 94.1          | 96.8          | 4.65608E-05   |
| Q91WQ3               | Yars1        | 118.6         | 114.6         | 118.6         | 93.4          | 97.9          | 96.9          | 95.3          | 94.2          | 91.6          | 91.3          | 96.3          | 91.5          | 6.56428E-05   |
| P63158               | Hmgbl        | 105.7         | 109.7         | 107.6         | 116.7         | 110.4         | 116.4         | 75            | 66.6          | 76.5          | 107.7         | 105.7         | 102           | 5.43714E-05   |
| Q8QZY1               | Eif3l        | 108.8         | 105.8         | 108.3         | 101           | 103.2         | 102.5         | 90.6          | 92.2          | 89.7          | 99.7          | 100.2         | 98            | 4.47401E-05   |
| P17918               | Pcna         | 116.1         | 119.2         | 112.9         | 105           | 102.9         | 103.1         | 81.2          | 82.4          | 80.9          | 98.9          | 101.6         | 95.8          | 2.58974E-05   |
| Q7TSC1               | Prrc2a       | 95.3          | 95.1          | 94            | 115           | 109           | 110.4         | 87.3          | 83.3          | 89.9          | 108.7         | 105.2         | 107           | 8.44592E-05   |
| P05202               | Got2         | 88.9          | 88.6          | 83.6          | 75.5          | 81.1          | 82.5          | 129.8         | 140.8         | 126.7         | 102.7         | 95.9          | 103.9         | 7.15723E-05   |
| Q99K85               | Psat1        | 123           | 122.4         | 122.1         | 99.2          | 98.1          | 98.8          | 83.1          | 86.3          | 83.1          | 94.4          | 96            | 93.4          | 1.9039E-06    |
| P54071               | Idh2         | 98            | 99.3          | 96.7          | 87.5          | 87.6          | 89.7          | 118.5         | 127.2         | 117.7         | 92.4          | 92.3          | 93.1          | 4.8877E-05    |
| P67778               | Phb          | 82.5          | 84.4          | 85.1          | 100.1         | 95.5          | 94.4          | 115.5         | 118.2         | 118.6         | 102.5         | 97.2          | 105.8         | 6.7414E-05    |
| P68510               | Ywhah        | 111.7         | 113.7         | 114.2         | 98.6          | 101.8         | 102.1         | 88.8          | 85.4          | 86.1          | 99            | 101.6         | 97            | 3.52341E-05   |
|                      | Atp6v1b      |               |               |               |               |               |               |               |               |               |               |               |               |               |
| P62814               | 2            | 99.6          | 99.6          | 99.7          | 90.4          | 91.8          | 93.1          | 113.5         | 114.8         | 108.4         | 96.9          | 96.4          | 95.8          | 7.15723E-05   |
| Q9CZU6               | Cs           | 92.5          | 89.1          | 92.2          | 91.2          | 93.2          | 93.9          | 118.3         | 124.5         | 118.7         | 94.2          | 94.7          | 97.6          | 2.96388E-05   |
| P51881               | Slc25a5      | 85.5          | 81.7          | 79.8          | 91.2          | 91.1          | 89.2          | 124.3         | 134.2         | 126.7         | 99.1          | 97.4          | 99.8          | 2.38593E-05   |
| Q9R1T2               | Sae1         | 116.4         | 117           | 120           | 97.3          | 99.4          | 100.4         | 88.3          | 90.3          | 85.7          | 94.7          | 97.4          | 92.9          | 2.76301E-05   |
| P11157               | Rrm2         | 69.3          | 71            | 69.1          | 119.2         | 109.9         | 114.8         | 96.1          | 99            | 95.8          | 121.5         | 118.6         | 115.7         | 1.70253E-05   |
| P21550               | Eno3         | 119           | 118           | 123.9         | 98.4          | 101.6         | 104.3         | 85.5          | 84.7          | 82.4          | 94.1          | 94.8          | 93.2          | 2.38593E-05   |
| Q8BH59               | Slc25a12     | 90.4          | 87.9          | 90.5          | 85.8          | 91.1          | 87.4          | 118.8         | 131.1         | 122.5         | 97.9          | 97.9          | 98.6          | 7.24382E-05   |

| Protein<br>Accession | Gene<br>Name | Control-<br>1 | Control-<br>2 | Control-<br>3 | APAP<br>100-1 | APAP<br>100-2 | APAP<br>100-3 | APAP<br>500-1 | APAP<br>500-2 | APAP<br>500-3 | APAP-<br>HU-1 | APAP-<br>HU-2 | APAP-<br>HU-3 | Adjust pvalue |
|----------------------|--------------|---------------|---------------|---------------|---------------|---------------|---------------|---------------|---------------|---------------|---------------|---------------|---------------|---------------|
| Q99L47               | St13         | 105.9         | 110.4         | 111.7         | 107.6         | 103.6         | 105.6         | 84            | 81.8          | 85.3          | 102.2         | 100.4         | 101.4         | 4.29071E-05   |
| O35857               | Timm44       | 85.3          | 88.7          | 90.5          | 94            | 94.2          | 91.3          | 118.7         | 122.7         | 121.6         | 99.3          | 96.1          | 97.8          | 1.81807E-05   |
| Q8BH04               | Pck2         | 102.4         | 103.3         | 103.3         | 83.1          | 88.4          | 88.1          | 118.8         | 123.2         | 116.3         | 87.8          | 93.4          | 91.8          | 4.47401E-05   |
| P50544               | Acadv1       | 74.5          | 73.5          | 78.4          | 85.4          | 89.6          | 85.3          | 142.9         | 147.3         | 139.9         | 93.7          | 94.5          | 95.2          | 2.35904E-06   |
| Q8BK64               | Ahsa1        | 102.3         | 102.8         | 101.1         | 107.2         | 106.4         | 102.4         | 89.4          | 89.3          | 89.3          | 104           | 104.6         | 101.2         | 9.57349E-05   |
| Q9WVA4               | Tagln2       | 112           | 117.3         | 116           | 107.6         | 100.6         | 106.6         | 82            | 76.4          | 77.1          | 105.3         | 100           | 99.1          | 7.24382E-05   |
| Q91VH2               | Snx9         | 120.4         | 118.4         | 118.4         | 89.1          | 97.9          | 96.3          | 94.1          | 93.6          | 91.9          | 92.3          | 95.6          | 92.1          | 7.15723E-05   |
| Q922U1               | Prpf3        | 100.7         | 100.8         | 102.6         | 110.4         | 108.7         | 107.9         | 88.3          | 85            | 88            | 100.5         | 103.4         | 103.8         | 2.95731E-05   |
| P25976               | Ubtg         | 106.5         | 109.9         | 107.7         | 103.8         | 101.7         | 102.9         | 90.1          | 89.8          | 91.1          | 99.6          | 99.8          | 97.1          | 3.65166E-05   |
| Q8R180               | Erola        | 103           | 100.7         | 100.7         | 78.5          | 84.5          | 86.7          | 127.7         | 130.8         | 119.2         | 87.9          | 90.8          | 89.5          | 6.20583E-05   |
| Q60668               | Hnrnpd       | 117.6         | 121.9         | 113.2         | 101           | 100.8         | 98.7          | 84.5          | 83.1          | 86            | 97.3          | 100.2         | 95.8          | 5.15026E-05   |
| D3Z7P3               | Gls          | 87.4          | 86.3          | 90.2          | 83.3          | 87.6          | 87            | 128.6         | 140.9         | 131.7         | 90.6          | 94            | 92.4          | 2.76658E-05   |
| Q9DCN2               | Cyb5r3       | 83.1          | 86.3          | 84.6          | 90.7          | 85.7          | 87.9          | 128.9         | 138.3         | 126.6         | 96.1          | 96.1          | 95.8          | 2.76658E-05   |
| Q8BI84               | Mia3         | 86.9          | 86.6          | 87.4          | 104.2         | 98.4          | 99.8          | 108.3         | 109.6         | 109.4         | 103.7         | 101.7         | 103.8         | 4.06613E-05   |
| Q6A065               | Cep170       | 108.5         | 107.1         | 105.5         | 114.6         | 107.8         | 111.3         | 80.9          | 76.5          | 80.2          | 100           | 105.9         | 101.6         | 4.61936E-05   |
| O35841               | Api5         | 119.6         | 118.9         | 124.1         | 93.6          | 99.7          | 100.3         | 90.5          | 86.9          | 84.6          | 91.3          | 97.4          | 93            | 8.24006E-05   |
| Q60865               | Caprin1      | 107.5         | 111.1         | 108.2         | 117.5         | 107.4         | 113.9         | 75            | 70.8          | 75.8          | 108.6         | 103           | 101.3         | 6.21969E-05   |
| P48722               | Hspa4l       | 93.4          | 95.5          | 92.9          | 87.2          | 92.3          | 94            | 124.6         | 120.6         | 116.3         | 92.1          | 96.5          | 94.7          | 8.51028E-05   |
| Q07076               | Anxa7        | 91.1          | 92.6          | 92.2          | 94.3          | 92.5          | 93.8          | 109.8         | 115.6         | 111.3         | 102.7         | 100.5         | 103.5         | 5.07121E-05   |
| Q6P9P6               | Kif11        | 82.6          | 79.2          | 83.3          | 109.5         | 113.9         | 113.7         | 93.5          | 100.8         | 98.4          | 105.6         | 111.3         | 108.3         | 7.07414E-05   |
| Q925I1               | Atad3        | 89.7          | 90.9          | 92.9          | 95.3          | 95.3          | 90.8          | 114.9         | 118.7         | 116.8         | 100.9         | 94.4          | 99.4          | 7.51165E-05   |
| P29758               | Oat          | 93.8          | 91.8          | 97.4          | 90.9          | 92.5          | 91.2          | 121.5         | 129.9         | 118.6         | 89.6          | 92.2          | 90.6          | 7.55784E-05   |
| Q8K297               | Colgalt1     | 87.9          | 87.6          | 91.3          | 91.9          | 92            | 88.8          | 119.8         | 131.9         | 122.7         | 96.5          | 94.5          | 95.2          | 6.94212E-05   |

| Protein<br>Accession | Gene<br>Name | Control-<br>1 | Control-<br>2 | Control-<br>3 | APAP<br>100-1 | APAP<br>100-2 | APAP<br>100-3 | APAP<br>500-1 | APAP<br>500-2 | APAP<br>500-3 | APAP-<br>HU-1 | APAP-<br>HU-2 | APAP-<br>HU-3 | Adjust pvalue |
|----------------------|--------------|---------------|---------------|---------------|---------------|---------------|---------------|---------------|---------------|---------------|---------------|---------------|---------------|---------------|
| Q810A7               | Ddx42        | 100.8         | 100.9         | 103.5         | 111.4         | 106.3         | 105.8         | 84.7          | 83.8          | 86.5          | 106.3         | 104.6         | 105.3         | 4.47401E-05   |
| P10711               | Tcea1        | 112.6         | 110.5         | 115.9         | 101.5         | 100.4         | 103.4         | 88.3          | 84.4          | 85.8          | 96            | 102.2         | 99            | 8.29845E-05   |
| Q8C1B7               | Septin11     | 107           | 108           | 111.2         | 99.4          | 100.6         | 101.8         | 92.3          | 91.7          | 89.8          | 99            | 101           | 98            | 9.3097E-05    |
| Q8K298               | Anln         | 88.3          | 86.8          | 85.5          | 127.4         | 123.3         | 130.5         | 70.5          | 75.2          | 76.9          | 109.3         | 117.1         | 109.1         | 1.96502E-05   |
| Q91VX2               | Ubap2        | 102.5         | 100.4         | 100.8         | 124.9         | 110.6         | 119.3         | 77.2          | 72.2          | 78.1          | 104.4         | 105.8         | 103.9         | 9.65963E-05   |
| Q8BNW9               | Kbtbd11      | 115.9         | 117.4         | 110.2         | 85.1          | 84.8          | 89.2          | 104.8         | 105.7         | 103.4         | 92.3          | 94.3          | 96.8          | 7.33727E-05   |
| O08808               | Diaph1       | 109.4         | 109.6         | 112.7         | 100.6         | 100.3         | 101.2         | 90            | 91.1          | 92.3          | 97.2          | 98.3          | 97.3          | 1.96502E-05   |
| Q9DCX2               | Atp5pd       | 79.5          | 82.3          | 81.5          | 101.2         | 96            | 95            | 119           | 119.3         | 118.3         | 105.3         | 97.7          | 105           | 4.19587E-05   |
| Q99KQ4               | Nampt        | 113           | 110.2         | 113.7         | 93.2          | 96.2          | 96.9          | 96.8          | 97.1          | 93.3          | 95.7          | 98            | 96            | 8.86508E-05   |
| Q99JY0               | Hadhb        | 82.9          | 86            | 85            | 100           | 95.9          | 91.2          | 117.8         | 123.2         | 121.7         | 98.8          | 97.3          | 100.1         | 4.47401E-05   |
| Q922Q8               | Lrrc59       | 108.9         | 112.3         | 112.2         | 98.6          | 95.8          | 100.3         | 95.1          | 96.7          | 96.2          | 94.2          | 95            | 94.7          | 6.73372E-05   |
| P46664               | Adss2        | 122.3         | 116.9         | 120.7         | 94.8          | 101.6         | 101.1         | 86.1          | 88.4          | 84.6          | 93.4          | 96.6          | 93.6          | 4.63182E-05   |
| P11440               | Cdk1         | 94            | 102.3         | 101.7         | 125.4         | 117.8         | 116           | 71.5          | 73.4          | 76.5          | 108.9         | 105.9         | 106.8         | 4.9195E-05    |
| Q9D051               | Pdhb         | 88.3          | 88.4          | 93.3          | 91.3          | 91.2          | 91.8          | 120.7         | 127.4         | 118.6         | 95            | 94            | 99.8          | 6.87947E-05   |
| Q5SSZ5               | Tns3         | 115.6         | 111.1         | 114.7         | 99.3          | 99.3          | 99.1          | 85.7          | 91            | 87.1          | 97.8          | 100.5         | 98.9          | 4.29071E-05   |
| Q9CQW2               | Arl8b        | 94.4          | 95.6          | 96.4          | 94            | 93            | 91.6          | 114.3         | 120.5         | 113.1         | 93.8          | 95.9          | 97.4          | 7.93899E-05   |
| A2APB8               | Tpx2         | 81.1          | 74.8          | 76.4          | 130.8         | 132.7         | 133.5         | 69.1          | 68.6          | 70.9          | 118.7         | 127.3         | 116           | 8.54234E-06   |
| Q5SXY1               | Specc1       | 109.2         | 106.3         | 105.6         | 105.7         | 102.7         | 107.6         | 86.3          | 86.4          | 86.4          | 99            | 103.8         | 101           | 7.15068E-05   |
| P51174               | Acadl        | 86.8          | 83.1          | 85.9          | 91            | 95.3          | 91            | 120.4         | 134.1         | 127.4         | 93.3          | 96.4          | 95.3          | 6.7414E-05    |
| Q9ESZ8               | Gtf2i        | 111.6         | 116.5         | 116.4         | 101.6         | 101.7         | 100.5         | 86.8          | 88.6          | 89.5          | 93.9          | 97            | 96            | 2.61375E-05   |
| P23198               | Cbx3         | 103.9         | 102.9         | 107.7         | 108.1         | 108.5         | 108.6         | 85            | 83.4          | 87.1          | 103           | 103.3         | 98.5          | 6.20315E-05   |
| Q9DCW4               | Etfb         | 89.1          | 90.8          | 94.5          | 90.6          | 91.8          | 91.7          | 120.9         | 124           | 119.1         | 95.7          | 94.5          | 97.3          | 1.83092E-05   |
| Q9D0F3               | Lman1        | 86            | 86.5          | 89.3          | 90            | 94            | 91            | 118.6         | 128.8         | 118.8         | 100.4         | 95.9          | 100.7         | 9.52528E-05   |

| Protein<br>Accession | Gene<br>Name | Control-<br>1 | Control-<br>2 | Control-<br>3 | APAP<br>100-1 | APAP<br>100-2 | APAP<br>100-3 | APAP<br>500-1 | APAP<br>500-2 | APAP<br>500-3 | APAP-<br>HU-1 | APAP-<br>HU-2 | APAP-<br>HU-3 | Adjust pvalue |
|----------------------|--------------|---------------|---------------|---------------|---------------|---------------|---------------|---------------|---------------|---------------|---------------|---------------|---------------|---------------|
| Q6NZF1               | Zc3h11a      | 95.5          | 90.3          | 91.9          | 116.5         | 112.4         | 110.3         | 89.4          | 87.6          | 89.6          | 105.7         | 107.3         | 103.3         | 7.15723E-05   |
| P10404               |              | 91.5          | 90.7          | 87.2          | 87.6          | 89.3          | 93.3          | 123.5         | 124.6         | 115.4         | 101.2         | 99.2          | 96.5          | 9.71942E-05   |
| O08795               | Prkcsh       | 82.2          | 85.6          | 87.5          | 93.5          | 92.2          | 92.4          | 121.5         | 125.4         | 120.7         | 100.8         | 96.9          | 101.3         | 1.76997E-05   |
| Q9Z2I9               | Sucla2       | 93.1          | 94.5          | 91.4          | 87.8          | 88.1          | 87.3          | 119           | 131.7         | 121.9         | 94.4          | 93.4          | 97.4          | 8.20987E-05   |
| Q9DBH5               | Lman2        | 89.1          | 90.3          | 93.6          | 92.6          | 95.2          | 90.9          | 114.4         | 120.3         | 116.2         | 100.3         | 96.2          | 100.8         | 7.48501E-05   |
| Q3TIV5               | Zc3h15       | 107.2         | 112.2         | 114.1         | 105.7         | 101.4         | 106.5         | 87.1          | 84.1          | 84.5          | 99.2          | 98.9          | 99            | 8.09981E-05   |
| P98078               | Dab2         | 102.1         | 105.4         | 98.3          | 131.9         | 116.6         | 133.1         | 58.9          | 55.3          | 61.8          | 114.1         | 111.3         | 111.2         | 4.05129E-05   |
| Q8BVE3               | Atp6v1h      | 93.8          | 88.9          | 93            | 89.6          | 94.8          | 92.3          | 117.7         | 122.4         | 116.9         | 95.7          | 98            | 97            | 4.82617E-05   |
| Q9DC61               | Pmpca        | 93.1          | 94.5          | 97.8          | 88            | 93.4          | 89.4          | 118.5         | 125.8         | 118.4         | 94            | 91.2          | 95.9          | 8.02617E-05   |
| Q60930               | Vdac2        | 93            | 91.3          | 89            | 85.1          | 86.3          | 89.1          | 127.5         | 131.2         | 118.8         | 95.2          | 96            | 97.3          | 5.97094E-05   |
| Q9CYN2               | Spcs2        | 89.3          | 90.1          | 92.9          | 95.5          | 95.4          | 96.2          | 113.1         | 114.9         | 110.6         | 101.9         | 97.4          | 102.6         | 7.45517E-05   |
| P32020               | Scp2         | 100.6         | 100.4         | 101.7         | 105.7         | 104.5         | 105.8         | 92.5          | 87.8          | 91.8          | 102.8         | 102.6         | 103.6         | 7.8241E-05    |
| Q8C129               | Lnpep        | 83.1          | 88.5          | 87.7          | 95.5          | 95.5          | 90.2          | 122.7         | 120.9         | 117.4         | 101.4         | 97.6          | 99.6          | 4.39456E-05   |
| Q6PGB6               | Naa50        | 106.9         | 111.4         | 108.2         | 102.1         | 100.2         | 101.1         | 88.6          | 88.1          | 86.7          | 103.5         | 101.3         | 101.9         | 2.95731E-05   |
| P35979               | Rpl12        | 103.8         | 105           | 103.6         | 99.8          | 102.3         | 99.9          | 93.5          | 94.6          | 95.2          | 100.5         | 101           | 100.7         | 9.92272E-05   |
| Q3UKJ7               | Smu1         | 109.6         | 107           | 106           | 101.4         | 99.6          | 100.1         | 91.4          | 92.4          | 90            | 100.2         | 101           | 101.4         | 4.47401E-05   |
| P59328               | Wdhd1        | 108.1         | 104.3         | 102.4         | 126.7         | 120.3         | 123.2         | 69.6          | 70.9          | 71.4          | 98            | 108.5         | 96.6          | 4.08553E-05   |
| Q60715               | P4ha1        | 112.7         | 114           | 115.7         | 100.8         | 102           | 103.4         | 88.3          | 92.6          | 90.5          | 92.3          | 93.4          | 94.2          | 2.0176E-05    |
| O35639               | Anxa3        | 78.2          | 82.7          | 79.7          | 95.3          | 91.9          | 93.4          | 114.1         | 118.8         | 114.2         | 109.7         | 109.3         | 112.7         | 1.70253E-05   |
| P39749               | Fen1         | 104.6         | 109.3         | 108           | 105.4         | 103.5         | 110.4         | 84.6          | 84.8          | 84.1          | 103           | 101.8         | 100.5         | 7.33727E-05   |
| Q8VEH3               | Arl8a        | 82.8          | 83.7          | 89.2          | 94.4          | 91.3          | 90.6          | 118.3         | 127.1         | 121           | 99.1          | 98.6          | 103.8         | 7.00366E-05   |
| Q9Z130               | Hnrnpdl      | 111.3         | 112.5         | 110.6         | 106.9         | 100.9         | 104.3         | 84.5          | 79            | 80.8          | 104.9         | 102.1         | 102.3         | 3.57173E-05   |
| Q9JJU8               | Sh3bgrl      | 108.2         | 109.4         | 109.9         | 104.5         | 104           | 103.4         | 84.6          | 83.3          | 84.2          | 104.3         | 102.2         | 102           | 1.9039E-06    |

| Protein<br>Accession | Gene<br>Name | Control-<br>1 | Control-<br>2 | Control-<br>3 | APAP<br>100-1 | APAP<br>100-2 | APAP<br>100-3 | APAP<br>500-1 | APAP<br>500-2 | APAP<br>500-3 | APAP-<br>HU-1 | APAP-<br>HU-2 | APAP-<br>HU-3 | Adjust pvalue |
|----------------------|--------------|---------------|---------------|---------------|---------------|---------------|---------------|---------------|---------------|---------------|---------------|---------------|---------------|---------------|
| P59325               | Eif5         | 110.6         | 113.3         | 112.9         | 93.8          | 92            | 95.9          | 99.9          | 100.2         | 96.5          | 94.7          | 96.2          | 94            | 5.97094E-05   |
| P97377               | Cdk2         | 93.4          | 96.4          | 99.2          | 115.8         | 108.9         | 111.5         | 85.8          | 86.1          | 85.7          | 106.2         | 104.7         | 106.2         | 6.24958E-05   |
| Q00547               | Hmmr         | 68.8          | 67.7          | 72.2          | 122.2         | 121.1         | 125.4         | 85.7          | 92.2          | 91.1          | 116.6         | 120.1         | 116.8         | 5.33395E-06   |
| Q920E5               | Fdps         | 139.6         | 137.3         | 136.3         | 91.5          | 103           | 106.5         | 73.5          | 72.2          | 68.8          | 89.9          | 94.2          | 87.1          | 2.89431E-05   |
| Q9EQH2               | Erap1        | 91.1          | 92.3          | 92.1          | 93.7          | 97            | 92            | 115.8         | 120.7         | 113.1         | 98.2          | 97.9          | 96.1          | 7.39442E-05   |
| Q8R5A3               | Apbb1ip      | 113.5         | 114.6         | 112.2         | 102.2         | 99.5          | 107.4         | 82.7          | 81.5          | 83.5          | 102.2         | 100.7         | 99.9          | 3.57134E-05   |
| Q9D2G2               | Dlst         | 86.3          | 86.5          | 87.9          | 98.3          | 93.9          | 95            | 116.9         | 112.4         | 117.2         | 105.2         | 97.7          | 102.8         | 8.45019E-05   |
| P28650               | Adss1        | 119.3         | 115.9         | 122.6         | 93.3          | 95.6          | 97.3          | 91.6          | 94.4          | 89.3          | 92.7          | 95.7          | 92.4          | 5.15026E-05   |
| Q61941               | Nnt          | 78.5          | 75.3          | 80.6          | 99.3          | 100.7         | 94.6          | 117.8         | 124.7         | 123           | 101.8         | 98.5          | 105.2         | 4.08553E-05   |
| Q8VEM8               | Slc25a3      | 87            | 83.4          | 86.6          | 89.2          | 92.4          | 88.4          | 127.4         | 132.8         | 124.3         | 96.5          | 95.6          | 96.3          | 1.756E-05     |
| Q922Q4               | Pycr2        | 87.7          | 88.3          | 87.2          | 94            | 93.4          | 94.9          | 115.8         | 123           | 117           | 100.4         | 97.3          | 100.9         | 2.96388E-05   |
| P45952               | Acadm        | 85.7          | 82.8          | 87.9          | 90.1          | 91.7          | 92.7          | 120.8         | 129.5         | 123.5         | 99.2          | 95            | 101.2         | 4.06613E-05   |
|                      | Atp6v0d      |               |               |               |               |               |               |               |               |               |               |               |               |               |
| P51863               | 1            | 93.5          | 95.6          | 85.3          | 82.9          | 88.1          | 87.3          | 126.1         | 130.5         | 126.1         | 94.1          | 96.6          | 93.8          | 4.19587E-05   |
| O09159               | Man2b1       | 75.1          | 79.9          | 78.7          | 92.1          | 93.4          | 87.6          | 129.7         | 136           | 131           | 100.2         | 97.5          | 98.8          | 9.56192E-06   |
| Q60931               | Vdac3        | 85.4          | 84            | 80.5          | 96            | 88.2          | 90.1          | 121           | 128.9         | 122.4         | 103.9         | 97.7          | 101.9         | 6.20531E-05   |
| Q9CR68               | Uqcrfs1      | 80.8          | 81            | 81.7          | 99.5          | 99.9          | 92.6          | 116.7         | 125.6         | 125.4         | 99.1          | 95.9          | 101.8         | 7.2363E-05    |
| Q80U78               | Pum1         | 110.6         | 107.8         | 110.5         | 104.7         | 102.2         | 103.6         | 87.6          | 88.8          | 92.5          | 96.7          | 98.7          | 96.4          | 6.42423E-05   |
| Q9D1J3               | Sarnp        | 108.3         | 104.5         | 108.2         | 114.2         | 109.7         | 114.3         | 81.4          | 70.7          | 80.9          | 101.5         | 103.2         | 103.1         | 9.68381E-05   |
| Q9QYG0               | Ndrp2        | 116.1         | 115.7         | 121.6         | 97.8          | 99            | 99            | 89.1          | 91.8          | 87.7          | 93.1          | 95.9          | 93.2          | 3.47152E-05   |
| Q9DCS9               | Ndufb10      | 79.7          | 82.3          | 81.1          | 102.8         | 94.4          | 95.2          | 119.2         | 117.9         | 118.6         | 105.2         | 98.9          | 104.7         | 5.12469E-05   |
| P35486               | Pdha1        | 91            | 86.4          | 92.8          | 88.4          | 90.9          | 91.5          | 123.2         | 129.3         | 122.4         | 93.1          | 95.7          | 95.3          | 2.83047E-05   |
| Q921G7               | Etfdh        | 87.2          | 80.1          | 83.2          | 84.9          | 90.8          | 88.5          | 128.8         | 140.4         | 129.4         | 92.7          | 97.9          | 96.1          | 4.63182E-05   |



| Protein<br>Accession | Gene<br>Name | Control-<br>1 | Control-<br>2 | Control-<br>3 | APAP<br>100-1 | APAP<br>100-2 | APAP<br>100-3 | APAP<br>500-1 | APAP<br>500-2 | APAP<br>500-3 | APAP-<br>HU-1 | APAP-<br>HU-2 | APAP-<br>HU-3 | Adjust pvalue |
|----------------------|--------------|---------------|---------------|---------------|---------------|---------------|---------------|---------------|---------------|---------------|---------------|---------------|---------------|---------------|
| Q91WN1               | Dnajc9       | 107.2         | 108.9         | 112.9         | 114.7         | 110.3         | 116.7         | 74.7          | 74.6          | 77.4          | 99.5          | 102.6         | 100.4         | 1.96502E-05   |
| Q6RT24               | Cenpe        | 71.5          | 69.9          | 68.8          | 127.4         | 118.5         | 120.4         | 85.5          | 91.7          | 97.9          | 118.5         | 116.1         | 113.7         | 3.49561E-05   |
| P35293               | Rab18        | 90            | 93.4          | 92.4          | 97.1          | 98.1          | 94.9          | 111.7         | 111.4         | 110.9         | 99.3          | 98.1          | 102.6         | 6.42423E-05   |
| Q8JZQ2               | Afg3l2       | 91.4          | 86.1          | 92.4          | 86.9          | 93.4          | 89.6          | 125.2         | 130.2         | 125.2         | 92.5          | 92.8          | 94.2          | 2.53608E-05   |
| P19536               | Cox5b        | 77.3          | 78.6          | 80.9          | 98.1          | 98            | 92.5          | 119.3         | 124.8         | 129.2         | 101.8         | 96.8          | 102.9         | 4.54763E-05   |
| P31266               | Rbpj         | 129.5         | 130.6         | 131.4         | 90.9          | 97.4          | 95.9          | 83.8          | 83.9          | 80.8          | 90.4          | 93.6          | 91.7          | 5.14414E-06   |
| Q62087               | Pon3         | 89.5          | 88.2          | 90.6          | 95.4          | 95.1          | 94            | 115.7         | 120.6         | 112.5         | 99.7          | 98.2          | 100.6         | 5.12469E-05   |
| Q61102               | Abcb7        | 85.9          | 91.4          | 89.5          | 95.5          | 96.8          | 91.9          | 119.9         | 119.8         | 116.9         | 97.9          | 95.1          | 99.4          | 4.06613E-05   |
| P52293               | Kpna2        | 86.2          | 83.7          | 87.8          | 124.1         | 128.7         | 128           | 73.1          | 75.7          | 75.2          | 109.2         | 115.7         | 112.4         | 4.96362E-06   |
| P97329               | Kif20a       | 75.4          | 73.3          | 74.3          | 110.1         | 116.8         | 118.9         | 88.5          | 98.6          | 92            | 113.5         | 121.3         | 117.3         | 5.4329E-05    |
| Q9JKB3               | Ybx3         | 113.7         | 113.4         | 111.1         | 115.9         | 107           | 110.1         | 75.7          | 71.9          | 81.6          | 99.8          | 101.3         | 98.6          | 6.88347E-05   |
|                      | Hsd17b1      |               |               |               |               |               |               |               |               |               |               |               |               |               |
| O08756               | 0            | 86.7          | 89.8          | 85.9          | 96.4          | 88.4          | 89.7          | 121.7         | 123.7         | 120           | 98.2          | 97.2          | 102.2         | 4.63182E-05   |
| Q9EP89               | Lactb        | 82.3          | 75.1          | 82.3          | 87.6          | 92.1          | 88.9          | 134           | 142.9         | 133.7         | 92.1          | 93.7          | 95.4          | 1.96502E-05   |
| Q91ZA3               | Pcca         | 93.5          | 88.4          | 94            | 87            | 89.5          | 86.6          | 125           | 132.4         | 123.2         | 94.5          | 93.3          | 92.6          | 3.09919E-05   |
| Q80TM9               | Nisch        | 76.9          | 76            | 78.1          | 93.1          | 96.3          | 92.2          | 118           | 129.7         | 127.1         | 101.7         | 103.5         | 107.3         | 4.07834E-05   |
| Q8C7X2               | Emc1         | 82.2          | 82.8          | 86.8          | 95.6          | 95            | 91.7          | 118.5         | 126           | 119           | 103.6         | 96.7          | 102.1         | 6.50838E-05   |
| Q99MN9               | Pccb         | 91.9          | 89.4          | 85.2          | 82.9          | 87.8          | 90.1          | 127.9         | 134.7         | 124.8         | 94.2          | 95.2          | 96            | 4.19898E-05   |
| Q3U0V2               | Tradd        | 90.9          | 91.4          | 92.3          | 85.9          | 90.2          | 88.4          | 121.6         | 133           | 124.3         | 92.1          | 96            | 94            | 4.65824E-05   |
| Q07417               | Acads        | 86.9          | 85.2          | 90.1          | 85.4          | 88.9          | 89.4          | 130.5         | 130.5         | 123.4         | 96.2          | 95.2          | 98.3          | 1.96502E-05   |
| Q922V4               | Plrg1        | 100.9         | 103.1         | 99.1          | 108.5         | 106.7         | 105.4         | 91.3          | 87.5          | 88.4          | 103.6         | 103.4         | 102.1         | 7.93899E-05   |
| Q99LP6               | Grpel1       | 81.9          | 85.9          | 86.6          | 94.1          | 95.1          | 93.8          | 120.7         | 122.1         | 121.9         | 100.2         | 95.7          | 102.2         | 1.76997E-05   |
| P20108               | Prdx3        | 82.2          | 82.9          | 81.4          | 96.5          | 91.5          | 89.4          | 118.5         | 131.4         | 126.7         | 101.7         | 97.2          | 100.7         | 7.39442E-05   |

| Protein<br>Accession | Gene<br>Name | Control-<br>1 | Control-<br>2 | Control-<br>3 | APAP<br>100-1 | APAP<br>100-2 | APAP<br>100-3 | APAP<br>500-1 | APAP<br>500-2 | APAP<br>500-3 | APAP-<br>HU-1 | APAP-<br>HU-2 | APAP-<br>HU-3 | Adjust pvalue |
|----------------------|--------------|---------------|---------------|---------------|---------------|---------------|---------------|---------------|---------------|---------------|---------------|---------------|---------------|---------------|
| Q99P31               | Hspbp1       | 120.3         | 122.1         | 116           | 95.6          | 98.7          | 101           | 84.9          | 84.8          | 82.8          | 97            | 100.2         | 96.5          | 2.87326E-05   |
| Q9JLN9               | Mtor         | 97.4          | 91.2          | 98.7          | 88.6          | 92.6          | 92            | 117.2         | 119.8         | 118.9         | 92            | 95.8          | 95.7          | 6.85537E-05   |
| Q6ZQM8               | Ugt1a7       | 88.5          | 88            | 91.5          | 91.2          | 88.9          | 87.6          | 123           | 131.8         | 122.9         | 96            | 94.6          | 95.8          | 2.95731E-05   |
| P09671               | Sod2         | 79.3          | 75.8          | 76            | 98.6          | 88.6          | 90.2          | 118.2         | 128.3         | 129           | 107.2         | 103.8         | 105           | 7.00366E-05   |
| P42125               | Eci1         | 87.2          | 84.9          | 92.3          | 91.2          | 94.4          | 90.1          | 120.1         | 126.7         | 126.4         | 94.2          | 94            | 98.7          | 4.92243E-05   |
| Q9DB20               | Atp5po       | 82.6          | 85.1          | 84.3          | 98.6          | 96.9          | 93.6          | 120.3         | 116.1         | 118           | 103.9         | 96.2          | 104.3         | 6.46683E-05   |
| P48024               | Eif1         | 89            | 91.4          | 92.4          | 110.6         | 111.8         | 109.5         | 84.6          | 86.5          | 88.9          | 114           | 110.7         | 110.6         | 1.76997E-05   |
| P33174               | Kif4         | 99.6          | 94.2          | 98.7          | 109.9         | 111.6         | 114.4         | 85.7          | 88.1          | 86.9          | 104.4         | 104.6         | 101.8         | 5.67837E-05   |
| Q8K2C9               | Hacd3        | 81.1          | 77.4          | 84.7          | 86.3          | 93.8          | 85.6          | 130.1         | 142           | 135.2         | 93.4          | 95.3          | 95.2          | 3.4792E-05    |
| Q60787               | Lcp2         | 104.7         | 115.7         | 106.6         | 124.6         | 115.5         | 119.3         | 59.2          | 59.1          | 61.6          | 112.2         | 113           | 108.5         | 2.16614E-05   |
| Q9DCE5               | Pak1ip1      | 115.2         | 114.7         | 116.9         | 97.3          | 98.3          | 100.6         | 88.4          | 89.1          | 87.1          | 94.5          | 100.9         | 97.3          | 3.49561E-05   |
| P99029               | Prdx5        | 85.3          | 86.9          | 89.7          | 92.2          | 93.7          | 91.7          | 121.8         | 119.2         | 117.5         | 101           | 99.9          | 101.2         | 1.10006E-05   |
| P38060               | Hmgcl        | 95            | 94.9          | 94.7          | 93.3          | 88.1          | 91.1          | 117.9         | 122.6         | 113.8         | 95.3          | 96.1          | 97.1          | 7.31812E-05   |
| Q8CGC6               | Rbm28        | 98.3          | 93.1          | 94.9          | 89.9          | 93.5          | 92.4          | 114.7         | 119           | 116.8         | 94            | 97.1          | 96.5          | 4.47401E-05   |
| D0QMC3               | Mndal        | 100.5         | 102           | 103.4         | 116.8         | 112.7         | 114.6         | 83.2          | 81.9          | 80.8          | 96.9          | 106.6         | 100.7         | 7.00366E-05   |
| Q8K268               | Abcf3        | 88.2          | 84.8          | 91.8          | 93.2          | 94.4          | 94.7          | 115.2         | 121           | 118.6         | 98.8          | 96.8          | 102.4         | 7.00366E-05   |
| Q8BGT7               | Smndc1       | 107.8         | 111.2         | 111.2         | 118.3         | 106.2         | 109           | 76.7          | 72.5          | 77.5          | 101.8         | 105.4         | 102.4         | 8.86508E-05   |
| A2AJI0               | Map7d1       | 102           | 100.4         | 102.1         | 118.4         | 113.1         | 113.4         | 78.3          | 74.7          | 85.5          | 102.9         | 105.6         | 103.6         | 8.2169E-05    |
| P10922               | H1-0         | 86.4          | 92.2          | 91.8          | 81.7          | 83.3          | 74.5          | 145.5         | 127.8         | 143.3         | 92.4          | 86.4          | 94.8          | 9.92272E-05   |
| Q8BH95               | Echs1        | 90            | 94            | 94.3          | 88.7          | 87.1          | 93.7          | 121.5         | 118.3         | 116.5         | 100.1         | 95.6          | 100.2         | 7.43152E-05   |
| Q8K4R9               | Dlgap5       | 95.2          | 94.6          | 93.7          | 119.4         | 118.6         | 120.8         | 74.3          | 74.3          | 78.4          | 108.1         | 112.7         | 110           | 3.35696E-06   |
| Q8BH24               | Tm9sf4       | 88.9          | 83.2          | 87.1          | 87            | 93            | 89            | 125.1         | 131.9         | 121.5         | 97            | 98.6          | 97.6          | 4.65824E-05   |
| Q2TBE6               | Pi4k2a       | 93.1          | 92.5          | 94.4          | 95            | 94.7          | 93.7          | 114.7         | 115.5         | 112.2         | 96.5          | 98.1          | 99.4          | 1.70253E-05   |

| Protein<br>Accession | Gene<br>Name | Control-<br>1 | Control-<br>2 | Control-<br>3 | APAP<br>100-1 | APAP<br>100-2 | APAP<br>100-3 | APAP<br>500-1 | APAP<br>500-2 | APAP<br>500-3 | APAP-<br>HU-1 | APAP-<br>HU-2 | APAP-<br>HU-3 | Adjust pvalue |
|----------------------|--------------|---------------|---------------|---------------|---------------|---------------|---------------|---------------|---------------|---------------|---------------|---------------|---------------|---------------|
| Hsd17b1              |              |               |               |               |               |               |               |               |               |               |               |               |               |               |
| O70503               | 2            | 95.4          | 98.7          | 94.4          | 89.6          | 91            | 92.1          | 115.1         | 118.2         | 112.8         | 98.4          | 96.3          | 97.9          | 4.29071E-05   |
| P70227               | Itpr3        | 126.2         | 119.2         | 124.6         | 82.4          | 87.2          | 82.4          | 110.7         | 113           | 112.6         | 78            | 83.4          | 80.2          | 1.6831E-05    |
| O08915               | Aip          | 111.7         | 113.7         | 110.5         | 97.3          | 96.3          | 96.8          | 96.8          | 96.4          | 95.5          | 92.9          | 96.2          | 96            | 2.79614E-05   |
| Q9EQ28               | Pold3        | 104.8         | 110.7         | 106           | 107.9         | 107.1         | 106.1         | 85.2          | 83.3          | 85.4          | 102.9         | 103           | 97.5          | 8.46186E-05   |
| P55096               | Abcd3        | 88.1          | 84.9          | 90.3          | 86.2          | 96.5          | 89.6          | 126.3         | 133.8         | 125.9         | 90.2          | 94.8          | 93.4          | 6.20583E-05   |
| Q05117               | Acp5         | 74.9          | 75.6          | 76.1          | 101.3         | 98.6          | 99.3          | 108           | 104.2         | 107.7         | 122.3         | 114.4         | 117.5         | 1.70253E-05   |
| O88783               | F5           | 44.3          | 44.5          | 42.9          | 73.1          | 74.9          | 68.3          | 185.6         | 201.8         | 174.1         | 104.8         | 88.2          | 97.7          | 1.70253E-05   |
| Q9JJ11               | Tacc3        | 76.7          | 79.4          | 78.8          | 131.4         | 113.9         | 128.8         | 76.1          | 77.7          | 81.4          | 121.6         | 117           | 117.2         | 6.46683E-05   |
| Zmpste2              |              |               |               |               |               |               |               |               |               |               |               |               |               |               |
| Q80W54               | 4            | 87.5          | 84.6          | 91.2          | 90.6          | 95.6          | 93.1          | 120           | 125.5         | 117.4         | 97.9          | 97.5          | 99.1          | 6.25225E-05   |
| P97494               | Gclc         | 95.8          | 92.2          | 94.4          | 82.2          | 86.5          | 86            | 116.3         | 126           | 116.7         | 100.6         | 101.9         | 101.4         | 7.39442E-05   |
| Q80U58               | Pum2         | 111.3         | 112.8         | 107           | 115.2         | 110.1         | 107.1         | 79.3          | 75.2          | 82.5          | 99.7          | 101.6         | 98.2          | 8.2169E-05    |
| Q9JLI6               | Scly         | 112.6         | 109.2         | 116           | 100.7         | 103.8         | 103.7         | 87.3          | 89.2          | 86.4          | 97            | 98            | 96.1          | 6.05346E-05   |
| Q922S8               | Kif2c        | 94.5          | 90.4          | 93.6          | 120.2         | 116.7         | 117.6         | 81.8          | 84.7          | 84            | 103           | 109.8         | 103.8         | 2.82228E-05   |
| P52633               | Stat6        | 112.3         | 112.6         | 112.8         | 97.4          | 100.8         | 99.8          | 87.2          | 92.6          | 92.2          | 95.5          | 98.8          | 98            | 7.33727E-05   |
| Q6ZPY7               | Kdm3b        | 113.9         | 115.3         | 117.9         | 102.8         | 102.2         | 103.4         | 84.5          | 88.9          | 87            | 92.3          | 96.1          | 95.7          | 2.24605E-05   |
| Q62433               | Ndrgl        | 117.3         | 112.9         | 117           | 100.7         | 102.6         | 99.8          | 85.9          | 88.4          | 91.9          | 91.1          | 97            | 95.5          | 8.76837E-05   |
| Q8K078               | Slco4a1      | 90            | 87.5          | 83.4          | 83.9          | 87.3          | 86.9          | 129.4         | 133.3         | 130.5         | 93.7          | 99.3          | 94.7          | 1.2797E-05    |
| Q9D1E6               | Tbcb         | 111.2         | 113.2         | 117.2         | 101.4         | 99.8          | 102.4         | 84.2          | 86.1          | 82.1          | 102.2         | 101.2         | 99            | 3.49561E-05   |
| O88531               | Ppt1         | 82.7          | 88.9          | 91            | 94.5          | 92.5          | 94.6          | 120.2         | 122           | 116           | 99.6          | 97.6          | 100.4         | 6.42423E-05   |
| Q8JZN5               | Acad9        | 90.7          | 80.2          | 87.1          | 86.1          | 91.9          | 89.3          | 127.6         | 141.1         | 129.9         | 90.4          | 93.8          | 91.8          | 8.13629E-05   |
| Q8R1V4               | Tmed4        | 74.3          | 74.4          | 76.5          | 98.7          | 97            | 90.1          | 117.5         | 126.4         | 127.1         | 106.3         | 103.2         | 108.4         | 4.61936E-05   |

| Protein<br>Accession | Gene<br>Name | Control-<br>1 | Control-<br>2 | Control-<br>3 | APAP<br>100-1 | APAP<br>100-2 | APAP<br>100-3 | APAP<br>500-1 | APAP<br>500-2 | APAP<br>500-3 | APAP-<br>HU-1 | APAP-<br>HU-2 | APAP-<br>HU-3 | Adjust pvalue |
|----------------------|--------------|---------------|---------------|---------------|---------------|---------------|---------------|---------------|---------------|---------------|---------------|---------------|---------------|---------------|
| Q9D6Y9               | Gbe1         | 103.1         | 102.3         | 104.4         | 89.9          | 94.1          | 91.7          | 109.1         | 112.9         | 110.2         | 92.2          | 95.7          | 94.3          | 6.37561E-05   |
| Q8C8U0               | Ppfibp1      | 120           | 117.1         | 122.4         | 105.3         | 106.4         | 109.4         | 78.5          | 79.5          | 80.3          | 90.6          | 97.6          | 92.8          | 2.00362E-05   |
| Q8BFZ9               | Erlin2       | 77.6          | 79.4          | 76.1          | 90.5          | 88.8          | 87.4          | 125.5         | 137.6         | 127.9         | 105.5         | 99.1          | 104.6         | 3.09919E-05   |
| Q9WUM5               | Suc1g1       | 93.9          | 94.4          | 89            | 89.2          | 90.4          | 91.1          | 122.5         | 124.8         | 115.8         | 97.6          | 96.7          | 94.7          | 6.46683E-05   |
| O35609               | Scamp3       | 89            | 87.2          | 87.9          | 93.2          | 101.2         | 93.1          | 118           | 117.7         | 115.3         | 98.4          | 98.4          | 100.6         | 7.05721E-05   |
| Q99JR1               | Sfxn1        | 85.1          | 85.5          | 87.2          | 96.2          | 95.8          | 91.1          | 117.4         | 123           | 122.8         | 100.7         | 96.1          | 99.1          | 2.96388E-05   |
| Q61771               | Kif3b        | 81.5          | 83.3          | 81            | 99.1          | 94.7          | 91.1          | 117           | 121.8         | 123.7         | 103.7         | 99.2          | 103.8         | 4.47401E-05   |
| Q9CQF9               | Pcyox1       | 75.4          | 77            | 78.6          | 96.1          | 93.6          | 90.1          | 125.6         | 131.1         | 127.5         | 101.8         | 97.7          | 105.6         | 1.76997E-05   |
| Q9Z0J0               | Npc2         | 78.8          | 78.8          | 77.7          | 102.7         | 100.1         | 101.2         | 112.2         | 113.3         | 111.3         | 113.8         | 105.1         | 105.1         | 3.93858E-05   |
| Q8BLH7               | Hirip3       | 132.4         | 126.9         | 128.9         | 111.3         | 111           | 110.7         | 65.8          | 65            | 68.7          | 91.4          | 96.8          | 91.2          | 2.35904E-06   |
| Q9D172               | Gatd3a       | 89.2          | 90.6          | 92            | 89            | 89.7          | 89.4          | 125           | 130.7         | 119.6         | 94.9          | 94.8          | 95.1          | 3.25629E-05   |
| Q9D379               | Ephx1        | 75.6          | 74.9          | 77            | 98.9          | 95.2          | 90.8          | 121.8         | 129.7         | 125.1         | 103.5         | 101.5         | 105.9         | 2.24605E-05   |
| Q3TDN2               | Faf2         | 90.3          | 89            | 94.4          | 96.4          | 91.9          | 92.6          | 114           | 121.1         | 118.5         | 95.1          | 97.9          | 98.8          | 9.74953E-05   |
| Q9ESW4               | Agk          | 87.5          | 85.3          | 89.2          | 86.9          | 93.9          | 90.3          | 125           | 136.1         | 125.9         | 91.2          | 94.9          | 93.9          | 5.27444E-05   |
| Q9D0S9               | Hint2        | 74.9          | 76.7          | 77.7          | 96            | 96.1          | 87.4          | 126.7         | 130.1         | 127.7         | 102.2         | 99.4          | 105.2         | 1.96502E-05   |
| O08663               | Metap2       | 120.2         | 122.3         | 118.6         | 100.9         | 100.1         | 102.9         | 79.4          | 84.5          | 78.2          | 96.2          | 97.5          | 99.3          | 1.72675E-05   |
| Q64FW2               | Retsat       | 81            | 77.9          | 81.5          | 91.2          | 91.7          | 87.2          | 128           | 138.2         | 136.9         | 90.9          | 98.5          | 96.9          | 2.61375E-05   |
| P52825               | Cpt2         | 94.9          | 90.9          | 91.9          | 92.1          | 91            | 94            | 118.7         | 118.9         | 114.6         | 95.4          | 97.9          | 99.6          | 3.5691E-05    |
| Q9DBS5               | Klc4         | 88.2          | 88.3          | 91.3          | 88.3          | 92.2          | 94            | 119.6         | 119.1         | 115.3         | 98.9          | 103.1         | 101.7         | 4.05129E-05   |
| Q8R344               | Ccdc12       | 104.2         | 113.1         | 107.6         | 121.6         | 109.6         | 118.1         | 71.2          | 67            | 75.2          | 104.7         | 104.2         | 103.4         | 8.24174E-05   |
| Q8BLF1               | Nceh1        | 80.5          | 82            | 82.1          | 90.1          | 90.2          | 85.6          | 129.8         | 138.6         | 127.6         | 99.2          | 95.2          | 99.1          | 2.38593E-05   |
| P56391               | Cox6b1       | 76.3          | 74.2          | 66            | 102.4         | 96.6          | 97.6          | 124           | 115.9         | 119.6         | 112.4         | 104.3         | 110.6         | 7.15723E-05   |
| Q08024               | Cbfb         | 105.4         | 108.4         | 108.5         | 109.7         | 107.5         | 104.9         | 81.3          | 86.7          | 82.8          | 103.2         | 102.1         | 99.6          | 5.8088E-05    |

| Protein<br>Accession | Gene<br>Name | Control-<br>1 | Control-<br>2 | Control-<br>3 | APAP<br>100-1 | APAP<br>100-2 | APAP<br>100-3 | APAP<br>500-1 | APAP<br>500-2 | APAP<br>500-3 | APAP-<br>HU-1 | APAP-<br>HU-2 | APAP-<br>HU-3 | Adjust pvalue |
|----------------------|--------------|---------------|---------------|---------------|---------------|---------------|---------------|---------------|---------------|---------------|---------------|---------------|---------------|---------------|
| A3KGF7               | Plcb2        | 110.6         | 112.6         | 111.2         | 105.9         | 104.8         | 105.2         | 82.9          | 82            | 86.6          | 96            | 102.5         | 99.6          | 4.05129E-05   |
| Q3V300               | Kif22        | 84.2          | 86.8          | 85.1          | 108.5         | 106.6         | 106.2         | 93.9          | 102.3         | 100           | 108.9         | 109.5         | 108           | 8.86508E-05   |
| P10923               | Spp1         | 74            | 75.5          | 72.6          | 135           | 126.9         | 137.7         | 61.3          | 63.7          | 72.3          | 127.5         | 124           | 129.5         | 1.2797E-05    |
| Q7TMF3               | Ndufa12      | 81.7          | 87.9          | 88            | 98.2          | 98            | 95.8          | 113.3         | 114           | 112.4         | 106           | 100.8         | 103.9         | 6.65487E-05   |
| P53395               | Dbt          | 84.7          | 83.4          | 84.4          | 92            | 85.8          | 89.2          | 125.1         | 130.6         | 126.3         | 101.4         | 95.9          | 101.2         | 1.76997E-05   |
| Q9D0D4               | Dimt1        | 109.7         | 112.7         | 111.7         | 99.5          | 97.3          | 98.8          | 92.2          | 92.8          | 90.7          | 97.9          | 100.4         | 96.1          | 4.63182E-05   |
| Q9CYR0               | Ssbp1        | 80.7          | 84.4          | 81.3          | 95            | 98            | 95.4          | 121.4         | 113.5         | 121.2         | 105.2         | 98.7          | 105.4         | 7.31812E-05   |
| Q8CDM1               | Atad2        | 80.9          | 75.9          | 80            | 79.5          | 86.8          | 86.4          | 139.9         | 151.1         | 143.2         | 89.9          | 94.1          | 92.4          | 1.63466E-05   |
| Q9CXE7               | Tmed5        | 80.4          | 83.8          | 80.4          | 101.3         | 98.2          | 96.7          | 112.6         | 112           | 114.8         | 109.4         | 103.9         | 106.8         | 2.70786E-05   |
| Q6NXI6               | Rprd2        | 109.2         | 108.7         | 107.3         | 109.5         | 104.8         | 107           | 84.9          | 84.8          | 88.8          | 96.9          | 99.8          | 98.3          | 4.19587E-05   |
| Q80Y14               | Glr5         | 88            | 90.3          | 89.5          | 91.7          | 93.1          | 92.5          | 125.3         | 118.4         | 118.4         | 99.9          | 97.4          | 95.7          | 2.95731E-05   |
| P09581               | Csflr        | 124.6         | 132.7         | 135.3         | 95            | 100.9         | 99.3          | 84.6          | 87.7          | 87.9          | 82.9          | 84.2          | 84.7          | 2.53608E-05   |
| P30204               | Msr1         | 107.7         | 113.4         | 109.6         | 110.9         | 106.3         | 104.2         | 75.5          | 77.6          | 76.5          | 107.5         | 104.8         | 105.9         | 2.38593E-05   |
| Q9Z0R9               | Fads2        | 134.5         | 136.3         | 145.6         | 118.7         | 117.6         | 117.8         | 68.7          | 72.9          | 72.2          | 71.5          | 70.6          | 73.5          | 4.40366E-06   |
| Q9Z0H4               | Celf2        | 112.4         | 112           | 109.7         | 100.5         | 97.8          | 104           | 87.4          | 88.2          | 87            | 100           | 100.3         | 100.7         | 4.08553E-05   |
| P04441               | Cd74         | 63.9          | 70.5          | 67.6          | 97.6          | 89            | 84.3          | 147           | 138.3         | 144.1         | 101.5         | 95.2          | 100.9         | 2.22534E-05   |
| Q3TVI8               | Pbxip1       | 66            | 69.3          | 68.9          | 98.4          | 92.2          | 99.7          | 140.7         | 124           | 132.9         | 102.7         | 99.6          | 105.5         | 4.61936E-05   |
| Q61425               | Hadh         | 83.6          | 84.2          | 86.3          | 89.4          | 91            | 88.4          | 128.3         | 134.4         | 131.7         | 93.6          | 93.6          | 95.6          | 2.59433E-06   |
| Q9CR62               | Slc25a11     | 80.5          | 86.2          | 86.5          | 94.2          | 93.4          | 87.8          | 126.3         | 123           | 125.4         | 99.7          | 94            | 102.9         | 5.15591E-05   |
| Q9CPV5               | Pmf1         | 99.6          | 106.1         | 106           | 113.5         | 109.6         | 113.4         | 78.8          | 80.6          | 85            | 102.3         | 103.6         | 101.4         | 7.15723E-05   |
| O88384               | Vti1b        | 78.3          | 79.3          | 81.5          | 104.9         | 99.6          | 97.1          | 110.1         | 112.8         | 117.3         | 103.6         | 105.5         | 110           | 9.40516E-05   |
| Q8R4N0               | Clybl        | 87            | 89.3          | 91.6          | 90.5          | 88.9          | 87.6          | 118.5         | 131.2         | 125.9         | 95.2          | 96.2          | 98.2          | 6.85537E-05   |
| Q9D666               | Sun1         | 82            | 77.6          | 83.8          | 92.6          | 94.9          | 88.5          | 129.9         | 136.1         | 126.5         | 93.8          | 97.5          | 96.8          | 2.76658E-05   |

| Protein<br>Accession | Gene<br>Name | Control-<br>1 | Control-<br>2 | Control-<br>3 | APAP<br>100-1 | APAP<br>100-2 | APAP<br>100-3 | APAP<br>500-1 | APAP<br>500-2 | APAP<br>500-3 | APAP-<br>HU-1 | APAP-<br>HU-2 | APAP-<br>HU-3 | Adjust pvalue |
|----------------------|--------------|---------------|---------------|---------------|---------------|---------------|---------------|---------------|---------------|---------------|---------------|---------------|---------------|---------------|
| Q9QXE7               | Tbl1x        | 114.4         | 117.9         | 116.7         | 99.4          | 94.4          | 98.6          | 93.3          | 92.3          | 88.4          | 92.8          | 97.8          | 94.1          | 8.26329E-05   |
| Q8R059               | Gale         | 87.8          | 88.7          | 88.7          | 88.8          | 88.7          | 86.6          | 124.2         | 133.1         | 128.8         | 94.9          | 95.4          | 94.3          | 1.18749E-05   |
| Q9CQC7               | Ndufb4       | 65.6          | 65.3          | 67.4          | 102.1         | 100.2         | 90.2          | 126.2         | 129.9         | 127.5         | 112.4         | 101.4         | 111.9         | 4.01713E-05   |
| P03975               | Iap          | 101.4         | 94.1          | 96.8          | 82.7          | 92.8          | 87            | 124.7         | 124.3         | 123.2         | 89            | 92.6          | 91.4          | 5.8088E-05    |
| Q9CQY5               | Magt1        | 89.8          | 90.6          | 94.5          | 98.7          | 96.7          | 94.7          | 111.6         | 112.2         | 115           | 98.1          | 97.4          | 100.8         | 9.43575E-05   |
| Q8CFE6               | Slc38a2      | 110.1         | 116.1         | 119.8         | 108.5         | 106.1         | 106.5         | 75.7          | 81.4          | 77.4          | 99.6          | 98            | 100.8         | 4.67397E-05   |
| Q9JHW4               | Eefsec       | 95            | 94.3          | 95.7          | 94.9          | 90.1          | 89.3          | 116.8         | 121.6         | 122           | 90.6          | 94.3          | 95.2          | 4.19587E-05   |
| Q9ERR7               | Selenof      | 72.9          | 80.2          | 73.9          | 96.5          | 88.6          | 91.2          | 124.9         | 125.7         | 131.2         | 106.3         | 99.5          | 109.1         | 4.78E-05      |
| Q99KB8               | Hagh         | 87            | 89            | 85.2          | 95.3          | 89.2          | 92.9          | 121           | 120.3         | 117.5         | 103           | 98.8          | 100.7         | 2.75949E-05   |
| P47740               | Aldh3a2      | 92.7          | 93.7          | 97.9          | 95.5          | 91.1          | 93.7          | 115.1         | 117.5         | 114.3         | 96.4          | 94.1          | 98            | 7.00366E-05   |
| Q9CZA6               | Nde1         | 89.4          | 87.8          | 89.7          | 118.9         | 114.5         | 113.7         | 82.3          | 84.7          | 92.4          | 108.1         | 108.9         | 109.8         | 7.24382E-05   |
| Q8QZS1               | Hibch        | 89.7          | 85            | 88.1          | 80.8          | 83            | 84.3          | 135.2         | 146           | 138.3         | 87.8          | 91.2          | 90.6          | 1.26945E-05   |
| Q9QZS3               | Numb         | 120.9         | 122.3         | 121.1         | 110.2         | 102.7         | 109           | 74.1          | 72.7          | 76.2          | 94.5          | 100.1         | 96.3          | 1.70253E-05   |
| Q9CX56               | Psm8         | 97.9          | 99.4          | 96.8          | 91.9          | 95            | 92.5          | 111.2         | 112.8         | 110.9         | 94.4          | 99.1          | 98.1          | 7.31812E-05   |
| Q9EPK6               | Sil1         | 90.9          | 102.3         | 95.4          | 85.9          | 85.6          | 83.2          | 126.6         | 129           | 123.9         | 92.1          | 92.7          | 92.4          | 3.94161E-05   |
| Q9R0Q4               | Morf4l2      | 99.9          | 106.7         | 102.9         | 127.2         | 121.5         | 120.2         | 60.7          | 59.2          | 63.1          | 115.3         | 113.2         | 110.1         | 7.81516E-06   |
| P22315               | Fech         | 92.1          | 88.9          | 95            | 90.5          | 90.3          | 88.1          | 121.9         | 134.9         | 124.2         | 90.2          | 93.8          | 90.1          | 8.7241E-05    |
| Q8K0C4               | Cyp51a1      | 127           | 121.4         | 124.4         | 95.4          | 99.9          | 101.8         | 82.6          | 91.2          | 85.6          | 87.9          | 94.6          | 88.2          | 7.33727E-05   |
| Q9D1C1               | Ube2c        | 100           | 104.9         | 101           | 132.2         | 120.7         | 125.2         | 62.8          | 68.3          | 69.4          | 104.9         | 105           | 105.7         | 2.23166E-05   |
| Q3ULF4               | Spg7         | 85.8          | 85.5          | 89.9          | 96.2          | 94.9          | 93.7          | 116.7         | 125.7         | 124.7         | 93            | 97.3          | 96.7          | 5.80601E-05   |
| Q8VEH8               | Erlec1       | 84.4          | 81.2          | 84.7          | 96.6          | 91.6          | 87.6          | 120.1         | 129.5         | 125.1         | 103.4         | 97            | 98.8          | 7.30482E-05   |
| Q9Z1S0               | Bub1b        | 104.7         | 104.2         | 110.8         | 117.4         | 118.8         | 119.4         | 70.2          | 72.1          | 76.1          | 99.5          | 107.2         | 99.6          | 3.22317E-05   |
| Q9CQE1               | Nipsnap      | 73.7          | 76.1          | 80.9          | 97.1          | 93.7          | 89.3          | 131.4         | 128.6         | 125.9         | 103.6         | 97.4          | 102.3         | 2.61375E-05   |

| Protein<br>Accession | Gene<br>Name | Control-<br>1 | Control-<br>2 | Control-<br>3 | APAP<br>100-1 | APAP<br>100-2 | APAP<br>100-3 | APAP<br>500-1 | APAP<br>500-2 | APAP<br>500-3 | APAP-<br>HU-1 | APAP-<br>HU-2 | APAP-<br>HU-3 | Adjust pvalue |
|----------------------|--------------|---------------|---------------|---------------|---------------|---------------|---------------|---------------|---------------|---------------|---------------|---------------|---------------|---------------|
| 3b                   |              |               |               |               |               |               |               |               |               |               |               |               |               |               |
| Q8JZK9               | Hmgcs1       | 146.2         | 131.4         | 136.9         | 100.3         | 112           | 114.1         | 60.1          | 67.4          | 65.3          | 85.4          | 93.6          | 87.3          | 4.92243E-05   |
| P30412               | Ppic         | 72.6          | 74.8          | 76.3          | 108.1         | 102.2         | 102.9         | 112.8         | 115.5         | 115.3         | 106.4         | 102.9         | 110.3         | 2.53795E-05   |
| P09450               | Junb         | 99.9          | 99.1          | 100           | 114           | 110.8         | 108.1         | 83.4          | 80.7          | 86.1          | 104.1         | 105.9         | 107.8         | 4.47401E-05   |
| Q9JHI5               | Ivd          | 87.1          | 86.4          | 88.3          | 89.5          | 93.9          | 93.8          | 118.3         | 126.4         | 122.9         | 96.6          | 99.8          | 97.1          | 2.95731E-05   |
| Q91VC9               | Ghitm        | 77.8          | 77.3          | 81.4          | 100.2         | 99.4          | 92.7          | 119           | 126.4         | 125.7         | 100.2         | 96.2          | 103.7         | 5.61462E-05   |
| P21126               | Ubl4a        | 95.4          | 97.9          | 97.7          | 109.6         | 106.2         | 105.6         | 87.7          | 88.7          | 89.7          | 107           | 105.7         | 108.8         | 4.00294E-05   |
| Q8K009               | Aldh1l2      | 99.6          | 88.1          | 93            | 75            | 86.3          | 81.4          | 136.9         | 143.6         | 132.7         | 84.3          | 89.2          | 89.8          | 5.87966E-05   |
| Q64430               | Atp7a        | 90.9          | 88.9          | 95            | 92.8          | 95.4          | 92.8          | 117.8         | 122.9         | 117.5         | 92.8          | 95.4          | 97.6          | 5.85888E-05   |
| E9Q1P8               | Irf2bp2      | 118.1         | 123.8         | 117.3         | 113.5         | 106.3         | 107.9         | 73.4          | 75.2          | 80.1          | 89.5          | 100.5         | 94.4          | 8.64579E-05   |
| Q8BWW4               | Larp4        | 107.7         | 106           | 107.7         | 109.7         | 108.8         | 110.9         | 81.2          | 79.5          | 84.1          | 101           | 100.8         | 102.7         | 9.56192E-06   |
| Q9DB73               | Cyb5r1       | 81            | 80.5          | 76.4          | 96.9          | 96.9          | 91.6          | 121.7         | 129           | 122.2         | 100.3         | 97.9          | 105.5         | 4.47401E-05   |
| P48725               | Pent         | 96            | 99            | 93.9          | 89.6          | 93.7          | 93.2          | 114.2         | 121.7         | 120.8         | 90.1          | 94.5          | 93.2          | 9.8067E-05    |
| Q99JF5               | Mvd          | 120.6         | 116.3         | 123.9         | 95.3          | 98.1          | 98.7          | 88.1          | 91.7          | 86            | 90.9          | 97            | 93.5          | 7.39442E-05   |
| Q9QWF0               | Chaf1a       | 122.2         | 112.6         | 118.3         | 107.4         | 111.3         | 112.9         | 73.1          | 80            | 80.2          | 92.8          | 97.2          | 91.9          | 7.07414E-05   |
| Q9CQL7               | Mrfap1       | 90.2          | 92.5          | 91.3          | 132.5         | 123.1         | 122.3         | 71            | 69.7          | 74.3          | 111.3         | 110.1         | 111.7         | 1.70253E-05   |
| Q9D3P8               | Plgrkt       | 67.9          | 72.5          | 71.6          | 105.6         | 101           | 95.9          | 120.8         | 115.6         | 120.3         | 111.2         | 102.9         | 114.7         | 6.7414E-05    |
| Q9Z2G9               | Htatip2      | 88.6          | 89.2          | 95            | 93.8          | 94.6          | 91.8          | 122           | 119.4         | 117.6         | 96.9          | 93.4          | 97.7          | 4.61936E-05   |
| P07607               | Tyms         | 95.6          | 95.5          | 100.6         | 111.6         | 110.5         | 108           | 85.1          | 88.1          | 87.7          | 105.7         | 105.6         | 106.1         | 4.63182E-05   |
| Q00422               | Gabpa        | 111.7         | 113.6         | 117.5         | 99.4          | 98.4          | 98.9          | 94.6          | 94.6          | 92            | 93.2          | 94.3          | 91.8          | 4.19587E-05   |
| Q99M54               | Cdca3        | 84            | 85.2          | 91.7          | 124.3         | 116.8         | 125.2         | 81.8          | 74.3          | 79.3          | 114.6         | 108.8         | 114           | 5.03983E-05   |
| P97477               | Aurka        | 79.1          | 80.9          | 83.4          | 118           | 114           | 115.5         | 91.6          | 93.1          | 90.6          | 110.2         | 113.9         | 109.7         | 1.18749E-05   |
| Q9CXX9               | Cuedc2       | 82.9          | 87.9          | 88.9          | 136.5         | 118.9         | 130.2         | 66.6          | 68            | 73.7          | 119.5         | 112.1         | 114.9         | 6.20583E-05   |

| Protein<br>Accession | Gene<br>Name | Control-<br>1 | Control-<br>2 | Control-<br>3 | APAP<br>100-1 | APAP<br>100-2 | APAP<br>100-3 | APAP<br>500-1 | APAP<br>500-2 | APAP<br>500-3 | APAP-<br>HU-1 | APAP-<br>HU-2 | APAP-<br>HU-3 | Adjust pvalue |
|----------------------|--------------|---------------|---------------|---------------|---------------|---------------|---------------|---------------|---------------|---------------|---------------|---------------|---------------|---------------|
| Q8R164               | Bphl         | 85.4          | 87.4          | 88.3          | 91.5          | 89            | 88.4          | 126.8         | 128.2         | 124.9         | 94            | 96.5          | 99.6          | 7.18133E-06   |
| Q9CQV1               | Pam16        | 70.8          | 74.5          | 71.7          | 105.8         | 100.9         | 94.6          | 123.8         | 118.9         | 126           | 106.8         | 97.4          | 108.9         | 8.79721E-05   |
| Q91XU3               | Pip4k2c      | 81.2          | 81.4          | 84.2          | 92.9          | 95.9          | 94.5          | 126.3         | 123.2         | 123.7         | 97.6          | 97.8          | 101.4         | 4.96362E-06   |
| O08603               | Raet1b       | 73.5          | 80.5          | 79.5          | 121.4         | 111.8         | 113           | 95.9          | 94.4          | 97.9          | 114.8         | 107.5         | 109.7         | 9.74953E-05   |
| Q9Z1P6               | Ndufa7       | 83.1          | 80.4          | 83.8          | 102.1         | 99.6          | 97.4          | 111.9         | 115.4         | 115.9         | 102.1         | 100.3         | 108           | 6.61856E-05   |
| Q99L13               | Hibadh       | 87.9          | 90.1          | 93.5          | 90.8          | 90.1          | 89.6          | 123.1         | 130.4         | 124.4         | 92.6          | 93.5          | 94            | 1.91235E-05   |
| Q9CQR4               | Acot13       | 74            | 75.3          | 78.5          | 90.2          | 88.8          | 86.1          | 137.1         | 139           | 129.3         | 102.6         | 96.4          | 102.7         | 1.76997E-05   |
| Q9D7P6               | Iscu         | 91.5          | 90.4          | 88.8          | 100.8         | 97.1          | 96.2          | 110.6         | 110.9         | 111.1         | 101.3         | 101.2         | 100.2         | 3.11077E-05   |
| Q3TFK5               | Gpatch4      | 107.2         | 109.5         | 111.5         | 112.3         | 109.8         | 104.8         | 82.1          | 78            | 84.4          | 100           | 99.8          | 100.7         | 7.14796E-05   |
| P52482               | Ube2e1       | 102           | 103.5         | 100.4         | 105.9         | 107.2         | 104.8         | 89.4          | 88.6          | 90.4          | 102.5         | 102.8         | 102.6         | 2.24605E-05   |
| P49025               | Cit          | 91.8          | 85.1          | 87.5          | 119.1         | 118.4         | 120.1         | 84            | 88.9          | 92.3          | 103.2         | 107.5         | 102           | 6.91539E-05   |
| Q8CHY6               | Gatad2a      | 102.9         | 107.2         | 105.9         | 116.3         | 108.9         | 109.2         | 82            | 77.9          | 82.2          | 99.6          | 105.4         | 102.6         | 9.63387E-05   |
| Q921J4               | Ube2s        | 72.3          | 76.3          | 74.9          | 123.3         | 117           | 116.1         | 85            | 86.9          | 90.7          | 119.5         | 118.5         | 119.4         | 1.09895E-05   |
| Q8K021               | Scamp1       | 86            | 83.4          | 88.9          | 98.1          | 98.1          | 94.7          | 114.1         | 119           | 118.5         | 98.8          | 98.8          | 101.4         | 4.01713E-05   |
| P24288               | Bcat1        | 113.9         | 115.5         | 118.6         | 104.7         | 109.1         | 108.1         | 77.8          | 81.5          | 81.8          | 91.1          | 101.9         | 95.9          | 8.3239E-05    |
| Q9CWW8               | Ndufaf7      | 85.6          | 88.2          | 90.9          | 92.1          | 91.6          | 92.7          | 119.6         | 131.8         | 123.8         | 94.2          | 94.5          | 94.9          | 5.97094E-05   |
| O70126               | Aurkb        | 75.7          | 78.5          | 78.1          | 119.9         | 114.6         | 113.3         | 89            | 101.2         | 94.3          | 114.4         | 110.7         | 110.4         | 7.53408E-05   |
|                      | Rnaseh2      |               |               |               |               |               |               |               |               |               |               |               |               |               |
| Q80ZV0               | b            | 107.1         | 112.6         | 113.4         | 106.5         | 105.8         | 108.6         | 81.2          | 86.2          | 86.6          | 96            | 98.8          | 97.3          | 7.39442E-05   |
| Q80YP0               | Cdk3         | 47.5          | 44.6          | 43.7          | 69            | 89.5          | 65.7          | 168.5         | 176.7         | 192.2         | 95            | 98.3          | 109.4         | 3.09919E-05   |
| Q99KR7               | Ppif         | 81.5          | 77.6          | 85.2          | 94.5          | 93.7          | 88.8          | 126.6         | 130.4         | 128.9         | 98            | 95.6          | 99.2          | 1.76997E-05   |
| Q8C166               | Cpne1        | 96            | 92.2          | 98.9          | 82.6          | 88.2          | 85.3          | 127.1         | 132.4         | 122.2         | 91.1          | 91            | 92.8          | 4.21484E-05   |
| Q91XD7               | Creld1       | 85.3          | 84.9          | 90.2          | 91.9          | 97.8          | 91            | 118           | 125.3         | 121.8         | 100.2         | 94.1          | 99.5          | 9.52528E-05   |



| Protein<br>Accession | Gene<br>Name | Control-<br>1 | Control-<br>2 | Control-<br>3 | APAP<br>100-1 | APAP<br>100-2 | APAP<br>100-3 | APAP<br>500-1 | APAP<br>500-2 | APAP<br>500-3 | APAP-<br>HU-1 | APAP-<br>HU-2 | APAP-<br>HU-3 | Adjust pvalue |
|----------------------|--------------|---------------|---------------|---------------|---------------|---------------|---------------|---------------|---------------|---------------|---------------|---------------|---------------|---------------|
| Q8CHT0               | Aldh4a1      | 81.1          | 77            | 79.7          | 87            | 86.7          | 86.4          | 128.5         | 146.4         | 141.4         | 93            | 95.4          | 97.2          | 4.21059E-05   |
| Q99LZ3               | Gins4        | 106.2         | 109.7         | 111.6         | 108.4         | 108.3         | 106.4         | 80.2          | 85            | 87.6          | 100           | 98.5          | 98.1          | 7.46716E-05   |
| Q9CQW9               | Ifitm3       | 88            | 87            | 96.1          | 123.1         | 131.1         | 114.7         | 70.4          | 73.1          | 72.7          | 112           | 113           | 118.9         | 9.2914E-05    |
| Q8VE62               | Paip1        | 112.1         | 114.9         | 116.9         | 101           | 96.8          | 102.3         | 89.2          | 88.5          | 87            | 99.3          | 97.7          | 94.4          | 7.32331E-05   |
| Q9D7B6               | Acad8        | 93.6          | 93.5          | 91.2          | 87.9          | 90.6          | 89            | 120.3         | 125.5         | 117.5         | 93            | 100.1         | 97.8          | 5.97094E-05   |
| Q05920               | Pc           | 82.2          | 82.9          | 87.4          | 86.6          | 93.9          | 87.9          | 127.2         | 138           | 140.6         | 88.3          | 91.1          | 94            | 4.8877E-05    |
| O35604               | Npc1         | 92.8          | 89            | 95.4          | 87            | 94.2          | 89.2          | 118.7         | 125.1         | 126.2         | 94.6          | 94.7          | 93.2          | 6.54149E-05   |
| Q91ZE0               | Tmlhe        | 96.2          | 87.4          | 96.8          | 84.3          | 90            | 88.6          | 124.1         | 131.6         | 123.7         | 88.9          | 94.3          | 94.2          | 9.95431E-05   |
| Q64442               | Sord         | 103.1         | 99.2          | 102.5         | 111.4         | 110.6         | 113.7         | 84.9          | 84.8          | 87.1          | 100.2         | 104.5         | 98            | 6.46683E-05   |
| Q9DCZ4               | Apoo         | 81.9          | 85.5          | 84            | 93.4          | 96.7          | 89.4          | 119.7         | 123.4         | 120.7         | 100.9         | 99.4          | 104.9         | 3.04874E-05   |
| Q9CXR1               | Dhrs7        | 92            | 83.6          | 94.7          | 86.8          | 90.7          | 88.1          | 129.9         | 139.5         | 125.9         | 87.1          | 90.4          | 91.3          | 9.52528E-05   |
| Q8JZU2               | Slc25a1      | 98.3          | 92.6          | 91.9          | 85.5          | 88.3          | 88.7          | 123.2         | 131.2         | 121.8         | 91.6          | 92.4          | 94.4          | 4.90078E-05   |
| Q61823               | Pdcd4        | 87.7          | 90            | 89.2          | 83.5          | 77.9          | 84            | 138           | 139.7         | 136.8         | 91            | 91.8          | 90.5          | 1.9039E-06    |
| O35405               | Pld3         | 66.6          | 68.2          | 71.6          | 91.1          | 93.4          | 90            | 131.7         | 136.4         | 132.8         | 105.8         | 104.5         | 107.9         | 1.9039E-06    |
| Q03267               | Ikzf1        | 119.1         | 115.8         | 124.5         | 103.5         | 106.3         | 108.8         | 74.5          | 75.2          | 82.8          | 95.6          | 98.5          | 95.3          | 5.97094E-05   |
| Q62086               | Pon2         | 86.1          | 91.4          | 91.5          | 94.1          | 92.5          | 90.3          | 115.9         | 124.1         | 121.7         | 96.2          | 96.5          | 99.6          | 7.00366E-05   |
| Q9QYR9               | Acot2        | 91.1          | 92.4          | 93.6          | 97.9          | 95.1          | 92.6          | 111.7         | 115.6         | 114.1         | 97            | 98            | 100.8         | 7.31812E-05   |
| Q3UVK0               | Ermp1        | 85.4          | 83.9          | 90.1          | 88.9          | 97.2          | 90.2          | 124.2         | 134.2         | 127.3         | 90.7          | 92.8          | 95            | 6.35329E-05   |
| Q8R080               | Gtse1        | 67.1          | 66.7          | 67.1          | 118.1         | 109.9         | 116.2         | 92            | 95            | 94            | 116.9         | 134.7         | 122.4         | 5.91773E-05   |
| Q9DBL1               | Acadsb       | 84.9          | 85.5          | 85.7          | 89.3          | 85.7          | 87.6          | 122.4         | 134.3         | 124.5         | 100.6         | 99.4          | 99.9          | 3.52341E-05   |
| Q8K4F5               | Abhd11       | 83.9          | 86.9          | 87.1          | 96            | 93.3          | 89.1          | 122.2         | 120.3         | 119.8         | 100.6         | 98.3          | 102.7         | 2.4964E-05    |
| Q8BR63               | Fam177a<br>1 | 78.3          | 83.3          | 82.4          | 110.9         | 109.3         | 106.3         | 100.7         | 97.7          | 103.3         | 110.5         | 107.6         | 109.9         | 4.21584E-05   |

| Protein<br>Accession | Gene<br>Name | Control-<br>1 | Control-<br>2 | Control-<br>3 | APAP<br>100-1 | APAP<br>100-2 | APAP<br>100-3 | APAP<br>500-1 | APAP<br>500-2 | APAP<br>500-3 | APAP-<br>HU-1 | APAP-<br>HU-2 | APAP-<br>HU-3 | Adjust pvalue |
|----------------------|--------------|---------------|---------------|---------------|---------------|---------------|---------------|---------------|---------------|---------------|---------------|---------------|---------------|---------------|
| P24860               | Ccnb1        | 83.9          | 85.6          | 86.4          | 122.5         | 117.8         | 130.7         | 74.7          | 73.8          | 77.9          | 116.7         | 112.8         | 117.1         | 2.61897E-05   |
| Q9R1Z7               | Pts          | 77.9          | 83.7          | 80.3          | 105.2         | 101.8         | 99.6          | 107           | 105.5         | 112.7         | 110.9         | 106.4         | 109.1         | 9.65963E-05   |
| Q05512               | Mark2        | 88.3          | 91.5          | 92            | 100.9         | 102.6         | 99.7          | 106.3         | 107.4         | 106.5         | 100.2         | 102.2         | 102.4         | 7.00366E-05   |
| Q61846               | Melk         | 73.9          | 71.3          | 76.5          | 98            | 102.6         | 101.7         | 116.7         | 129.4         | 117.7         | 101.8         | 106.8         | 103.6         | 7.33727E-05   |
| Q8CFE2               | Hpfl         | 129           | 122           | 132.3         | 88.1          | 88.4          | 88            | 98.1          | 102.4         | 96.2          | 81.8          | 89.9          | 83.9          | 4.92243E-05   |
| Q8VBZ0               | Dhrsx        | 86.5          | 89.6          | 86.6          | 94.3          | 95.5          | 93.2          | 117.1         | 113.2         | 120.1         | 104.6         | 98.7          | 100.7         | 6.1428E-05    |
| Q60780               | Gas7         | 122.4         | 117.4         | 125.6         | 94.6          | 100.5         | 100.3         | 81.2          | 84.8          | 83.5          | 95.1          | 98.2          | 96.3          | 4.19898E-05   |
| Q8VEB4               | Pla2g15      | 80.6          | 81.4          | 79.8          | 100.6         | 96.1          | 94.9          | 114.7         | 122.1         | 120.5         | 101.8         | 104.9         | 102.4         | 2.95731E-05   |
| Q9ERG0               | Lima1        | 85.2          | 83.7          | 87.2          | 104.8         | 100.8         | 106           | 100.5         | 97.5          | 101.4         | 112.4         | 108.3         | 112.2         | 6.88011E-05   |
| Q9JJ94               | Ssna1        | 114.7         | 123.3         | 122.1         | 118.6         | 112.3         | 116.5         | 62.1          | 62.8          | 64.8          | 102.4         | 102.2         | 98.2          | 1.21966E-05   |
| Q9CQX4               | Pclaf        | 104.4         | 106.4         | 108.3         | 130           | 124.4         | 126.3         | 60.7          | 57.7          | 62.7          | 106.1         | 107.4         | 105.6         | 1.9039E-06    |
| Q60929               | Mef2a        | 117.4         | 114.6         | 116.2         | 109.5         | 106.3         | 112.7         | 77.6          | 74.3          | 78.4          | 96.4          | 97.6          | 99.1          | 1.3882E-05    |
| Q9D6M3               | Slc25a22     | 86.5          | 85.7          | 84.1          | 96.3          | 88.7          | 94.8          | 121.8         | 127.7         | 119.7         | 101.8         | 97            | 95.9          | 6.65487E-05   |
| Q91XE8               | Tmem20<br>5  | 83.8          | 82.2          | 84            | 88.4          | 92.1          | 87.2          | 127.2         | 138.9         | 135.5         | 90.6          | 93.8          | 96.2          | 2.55575E-05   |
| Q921Q3               | Alg1         | 88.2          | 84.8          | 83.4          | 81.5          | 84.9          | 84.9          | 138.8         | 143.6         | 128.1         | 93.9          | 94.1          | 93.7          | 3.42332E-05   |
| Q8BVK9               | Sp110        | 120.8         | 120.7         | 126.8         | 106.5         | 92.9          | 104.4         | 77.5          | 71.6          | 74            | 99.5          | 103.9         | 101.4         | 9.42022E-05   |
| Q8BHG9               | Cggbp1       | 115           | 115.9         | 121.1         | 111.8         | 111.3         | 111           | 74.9          | 74.7          | 77.9          | 91.5          | 99            | 95.9          | 1.96502E-05   |
| Q9JKF6               | Nectin1      | 112.7         | 121.2         | 114           | 116.6         | 110.9         | 107.9         | 74            | 71.2          | 76.8          | 100.6         | 97.4          | 96.7          | 4.92243E-05   |
| P61025               | Cks1b        | 102.8         | 96.4          | 90.3          | 140.7         | 127.7         | 134.8         | 54.4          | 50.6          | 55            | 122.5         | 115.2         | 109.6         | 2.88539E-05   |
| Q8BYI6               | Lpcat2       | 97.2          | 95.5          | 95.8          | 91.1          | 92            | 95.3          | 109.6         | 111.1         | 112.3         | 101.1         | 99.1          | 100           | 4.47401E-05   |
| Q9CYK1               | Wars2        | 78.5          | 80.8          | 80.5          | 91.8          | 87.2          | 82.5          | 128.9         | 139.9         | 133.9         | 99.7          | 97.6          | 98.7          | 2.38593E-05   |
| P28741               | Kif3a        | 88.8          | 85.2          | 90.1          | 91.1          | 95            | 92.1          | 117           | 124.4         | 123           | 95            | 99.3          | 99.2          | 4.8877E-05    |

| Protein<br>Accession | Gene<br>Name | Control-<br>1 | Control-<br>2 | Control-<br>3 | APAP<br>100-1 | APAP<br>100-2 | APAP<br>100-3 | APAP<br>500-1 | APAP<br>500-2 | APAP<br>500-3 | APAP-<br>HU-1 | APAP-<br>HU-2 | APAP-<br>HU-3 | Adjust pvalue |
|----------------------|--------------|---------------|---------------|---------------|---------------|---------------|---------------|---------------|---------------|---------------|---------------|---------------|---------------|---------------|
| P31651               | Slc6a12      | 102.3         | 96.8          | 106.4         | 83.5          | 89.4          | 87.4          | 127.4         | 130.3         | 122.5         | 83.5          | 83.8          | 86.7          | 4.39456E-05   |
| Q9CQE7               | Ergic3       | 80.9          | 90.6          | 85.5          | 96.4          | 93.2          | 89.8          | 122.7         | 124.1         | 120.9         | 98.6          | 95.1          | 102.2         | 8.64579E-05   |
| Q8BZR9               | Ncbp3        | 83.3          | 78.4          | 82.5          | 90.5          | 96.4          | 90.4          | 118.9         | 128.1         | 125.4         | 100.3         | 99.5          | 106.1         | 6.25225E-05   |
|                      | Tmem87       |               |               |               |               |               |               |               |               |               |               |               |               |               |
| Q8BXN9               | a            | 80.2          | 84.2          | 86            | 99.8          | 97.3          | 92.7          | 111.2         | 116.7         | 115.1         | 106.4         | 103.2         | 107.3         | 8.86508E-05   |
| Q8BUE4               | Aifm2        | 89.6          | 90.2          | 94.5          | 91.6          | 91.5          | 92.5          | 116.9         | 121.8         | 117.5         | 96.8          | 96.8          | 100.4         | 3.23568E-05   |
| Q64281               | Lilrb4       | 76.4          | 79.6          | 76.6          | 118.4         | 105.7         | 104.7         | 86.9          | 85.8          | 87            | 128.7         | 121.2         | 128.8         | 6.4123E-05    |
| P19221               | F2           | 35.4          | 35.7          | 31.7          | 61.9          | 62.6          | 56.3          | 178.7         | 231           | 188.5         | 112.6         | 93.4          | 112.3         | 6.94212E-05   |
|                      | Hsd17b1      |               |               |               |               |               |               |               |               |               |               |               |               |               |
| Q9EQ06               | 1            | 90.8          | 93            | 93.4          | 92.3          | 92.5          | 91.7          | 112           | 121           | 118.6         | 97.3          | 97.1          | 100.2         | 8.44185E-05   |
| Q9CQS5               | Riok2        | 111           | 113.8         | 117           | 104.4         | 102.4         | 100           | 88.3          | 89.4          | 90.1          | 91.7          | 96.3          | 95.4          | 7.32331E-05   |
| Q8K1Z0               | Coq9         | 84.7          | 90.8          | 89.9          | 94.1          | 89.4          | 91.4          | 123.6         | 119.5         | 118.7         | 98.5          | 95.9          | 103.4         | 7.3578E-05    |
| Q99N84               | Mrps18b      | 93.7          | 93.7          | 89.7          | 95            | 89.8          | 92.3          | 118.5         | 116.3         | 114.2         | 97.8          | 97.4          | 101.6         | 6.91539E-05   |
| Q8CCH2               | Nhlrc3       | 81.2          | 81.2          | 82.7          | 105.2         | 97            | 103           | 111.3         | 109.3         | 114.9         | 107.2         | 103.9         | 103.1         | 8.13629E-05   |
| Q9DAS9               | Gng12        | 88.1          | 87.8          | 87.3          | 100.6         | 100.1         | 98.6          | 109.8         | 106.7         | 110.5         | 105.2         | 99.9          | 105.5         | 7.98552E-05   |
| Q61048               | Wbp4         | 102.2         | 101.1         | 104.7         | 121.7         | 114.7         | 116.2         | 70.9          | 73            | 79.3          | 104.8         | 102.2         | 109.3         | 4.92243E-05   |
| Q8K0Z7               | Taco1        | 88.2          | 91            | 90.3          | 86.9          | 96            | 90.1          | 121.3         | 132.7         | 125.3         | 90.4          | 93.9          | 94            | 8.7241E-05    |
|                      | Arhgef1      |               |               |               |               |               |               |               |               |               |               |               |               |               |
| A2AWP8               | 0l           | 118.6         | 113.9         | 114.5         | 97.5          | 103.3         | 101.5         | 90.3          | 91.8          | 91.4          | 91.4          | 93            | 92.9          | 4.19587E-05   |
| Q3V1H1               | Ckap2        | 67.5          | 70.5          | 70.4          | 136.2         | 121.5         | 122.3         | 84.2          | 84.3          | 88            | 115.2         | 125.1         | 114.8         | 5.15026E-05   |
| Q9WVM1               | Racgap1      | 87.8          | 86.6          | 86.5          | 110.2         | 103.8         | 109.1         | 91.9          | 95.7          | 94.6          | 112.4         | 113.6         | 107.8         | 8.64579E-05   |
| Q31125               | Slc39a7      | 84.9          | 85.7          | 90.6          | 94.7          | 92.4          | 90.4          | 117.7         | 120.9         | 118.8         | 104           | 97.4          | 102.5         | 4.90078E-05   |
| P43883               | Plin2        | 55            | 56.5          | 57.6          | 82            | 79.1          | 79.7          | 163.1         | 169           | 160           | 99.3          | 96.8          | 101.9         | 1.61924E-06   |

| Protein<br>Accession | Gene<br>Name | Control-<br>1 | Control-<br>2 | Control-<br>3 | APAP<br>100-1 | APAP<br>100-2 | APAP<br>100-3 | APAP<br>500-1 | APAP<br>500-2 | APAP<br>500-3 | APAP-<br>HU-1 | APAP-<br>HU-2 | APAP-<br>HU-3 | Adjust pvalue |
|----------------------|--------------|---------------|---------------|---------------|---------------|---------------|---------------|---------------|---------------|---------------|---------------|---------------|---------------|---------------|
| Q8R1G6               | Pdlim2       | 114.6         | 111.9         | 112.3         | 103.5         | 102.4         | 105.8         | 84.3          | 83.1          | 82.2          | 97.1          | 100.1         | 102.6         | 2.24605E-05   |
| Q9Z2Z6               | Slc25a20     | 84.3          | 80.7          | 80.3          | 92.8          | 91.6          | 91.1          | 124           | 134.5         | 123.4         | 100.1         | 96.6          | 100.6         | 4.08553E-05   |
| Q3UDF0               | Slc2a6       | 78            | 81.1          | 85.4          | 91.8          | 91.1          | 88.5          | 125.1         | 124.7         | 123.1         | 106.7         | 96.9          | 107.6         | 5.42103E-05   |
| Q9CPQ1               | Cox6c        | 69.5          | 69.8          | 67.8          | 95.8          | 104.9         | 90.6          | 133.8         | 126           | 128.3         | 105.8         | 97.7          | 110           | 7.15723E-05   |
| Q80WR5               |              | 117.1         | 120.4         | 120.3         | 100.3         | 97.2          | 100.7         | 90.3          | 79.5          | 83            | 97.5          | 97.2          | 96.6          | 7.3578E-05    |
| Q9CQ88               | Tspan31      | 84            | 85.3          | 83.9          | 89.3          | 82.8          | 89.1          | 132.7         | 135.2         | 125           | 97.9          | 97.6          | 97.1          | 2.38593E-05   |
| Q922H2               | Pdk3         | 90.1          | 90            | 92.9          | 89.1          | 91.8          | 94.7          | 118.2         | 125.3         | 122           | 94.1          | 94.6          | 97.1          | 3.50583E-05   |
| Q9WUZ9               | Entpd5       | 88.5          | 87.2          | 92.7          | 94.3          | 91.1          | 88.4          | 122.8         | 127.8         | 123.7         | 93.3          | 94.9          | 95.1          | 2.25608E-05   |
| Q9D600               | Gins2        | 101.6         | 104.1         | 104.6         | 122.4         | 111.5         | 113.5         | 76.1          | 74.7          | 79.9          | 100.6         | 105.9         | 105.2         | 8.3239E-05    |
| Q91WK1               | Spryd4       | 84.3          | 90.4          | 87.4          | 98.6          | 93.3          | 90.9          | 116.8         | 117.3         | 118           | 99.3          | 100           | 103.7         | 7.91683E-05   |
| Q9R1S3               | Pign         | 80.8          | 77.4          | 83.3          | 94.6          | 95.6          | 92.4          | 122.5         | 130.3         | 129.7         | 94.7          | 96.5          | 102.3         | 3.46106E-05   |
| O35386               | Phyh         | 117.5         | 115.7         | 119.3         | 94.5          | 98.6          | 98.1          | 92.4          | 96.9          | 94.9          | 87.1          | 94.3          | 90.7          | 7.54806E-05   |
| Q9D6K5               | Synj2bp      | 77            | 79.5          | 82.1          | 97.1          | 94.7          | 91.5          | 124.8         | 122.2         | 122.6         | 104.1         | 98.4          | 105.9         | 2.47248E-05   |
| Q8BH79               | Ano10        | 84.7          | 75.8          | 86.7          | 80.8          | 89.9          | 80.7          | 139.2         | 154           | 140.7         | 86.4          | 91.5          | 89.6          | 5.15026E-05   |
|                      | Rnaseh2      |               |               |               |               |               |               |               |               |               |               |               |               |               |
| Q9CQ18               | c            | 112.8         | 125.2         | 125           | 120.6         | 105.2         | 118.1         | 62.9          | 63.5          | 64.5          | 104           | 98            | 100.2         | 8.64579E-05   |
| O35598               | Adam10       | 95.6          | 89.9          | 91.6          | 91.6          | 94.5          | 90.4          | 121.2         | 128.2         | 121.2         | 90.2          | 94.3          | 91.1          | 4.47401E-05   |
| Q9CRA5               | Golph3       | 111.9         | 112.8         | 117.7         | 100.5         | 99.9          | 98.3          | 92.5          | 91.4          | 89.3          | 94.5          | 96.4          | 94.8          | 4.90078E-05   |
| Q99J27               | Slc33a1      | 85.7          | 88            | 77.5          | 93.6          | 88.4          | 89.8          | 119.6         | 124.8         | 124.4         | 103.4         | 103.6         | 101.2         | 6.1428E-05    |
| Q8C263               | Ska3         | 67.8          | 69.1          | 67.9          | 102.9         | 110           | 109.6         | 100.2         | 113.2         | 113.1         | 118           | 116.6         | 111.7         | 7.39442E-05   |
| P50171               | Hsd17b8      | 78.8          | 80.8          | 79.9          | 90.5          | 87.1          | 85.4          | 141.5         | 134.6         | 127.8         | 101.1         | 95.3          | 97.3          | 2.92872E-05   |
| P0C6B7               | Igsf6        | 110.5         | 109.2         | 119           | 110.7         | 111.1         | 116.4         | 69.6          | 70.2          | 67.5          | 110.4         | 101.9         | 103.5         | 4.61361E-05   |
| Q9D2R6               | Coa3         | 68.5          | 70.9          | 65.8          | 102.1         | 98.2          | 91            | 131.3         | 122.8         | 128.7         | 110.4         | 100           | 110.2         | 5.36108E-05   |

| Protein<br>Accession | Gene<br>Name | Control-<br>1 | Control-<br>2 | Control-<br>3 | APAP<br>100-1 | APAP<br>100-2 | APAP<br>100-3 | APAP<br>500-1 | APAP<br>500-2 | APAP<br>500-3 | APAP-<br>HU-1 | APAP-<br>HU-2 | APAP-<br>HU-3 | Adjust pvalue |
|----------------------|--------------|---------------|---------------|---------------|---------------|---------------|---------------|---------------|---------------|---------------|---------------|---------------|---------------|---------------|
| Q9ER41               | Tor1b        | 82.1          | 82.7          | 85            | 93.8          | 90.6          | 89.3          | 130.8         | 127.9         | 120.2         | 100.3         | 98            | 99.3          | 3.05793E-05   |
| Q9DCC8               | Tomm20       | 85.6          | 87.8          | 87.1          | 97.3          | 101           | 100           | 113.7         | 110.1         | 113.4         | 102.6         | 98            | 103.5         | 5.99019E-05   |
| P11881               | Itpr1        | 113.8         | 100.5         | 104.2         | 77.7          | 80.8          | 77.2          | 136.6         | 136.8         | 129.4         | 79.6          | 80.9          | 82.5          | 2.76658E-05   |
| Q80TN4               | Dnajc16      | 85.3          | 82.3          | 89.1          | 95.7          | 96.9          | 95            | 119.5         | 123.5         | 122.8         | 95            | 95.2          | 99.8          | 2.70786E-05   |
| Q6PG16               | Hjurp        | 71.5          | 65.9          | 71.1          | 125           | 129.5         | 130.8         | 85.5          | 87.3          | 88.8          | 107.1         | 120.3         | 117           | 2.54184E-05   |
| O55126               | Nipsnap<br>2 | 88.2          | 84            | 88.6          | 92.3          | 92.2          | 89.8          | 122.5         | 127.3         | 122.1         | 98.1          | 92.7          | 102.2         | 4.82617E-05   |
| O55125               | Nipsnap<br>1 | 86.5          | 85.9          | 87.8          | 93.2          | 90.6          | 90.9          | 120.4         | 128.1         | 125.8         | 97.5          | 94.2          | 99            | 2.07025E-05   |
| Q811J3               | Ireb2        | 121.5         | 126.8         | 127.4         | 101.8         | 103.7         | 105.4         | 76.6          | 79.4          | 83.7          | 88            | 92.3          | 93.5          | 2.38593E-05   |
| P0DOV2               | Ifi204       | 87            | 88.1          | 82.3          | 112.8         | 106.5         | 106.2         | 90.5          | 89.1          | 88            | 116.2         | 114.4         | 118.9         | 4.47401E-05   |
| Q61703               | Itih2        | 46.3          | 48.5          | 46.8          | 59.6          | 60            | 56.2          | 154.2         | 196           | 178.3         | 125.6         | 99.9          | 128.6         | 8.72476E-05   |
| Q9D3B1               | Hacd2        | 68.2          | 69.2          | 73.6          | 86.1          | 99.7          | 83.5          | 134.5         | 145.5         | 141.7         | 95.6          | 98.4          | 103.9         | 5.2417E-05    |
| Q6RUT7               | Ccsmst1      | 70.8          | 76.4          | 77.8          | 95.4          | 93.2          | 89.1          | 127.5         | 127.3         | 130.6         | 102.7         | 98.1          | 111.2         | 4.67397E-05   |
| P61804               | Dad1         | 76.6          | 79.1          | 80.6          | 88.8          | 92.8          | 88.8          | 119.2         | 120.8         | 131.3         | 112.5         | 102.9         | 106.6         | 8.70273E-05   |
| Q91WA1               | Tipin        | 104.8         | 115.4         | 110.9         | 132.2         | 117.4         | 133.3         | 54.9          | 51.6          | 61            | 108.2         | 105.8         | 104.5         | 4.61936E-05   |
| Q9D975               | Srxn1        | 74.9          | 80.6          | 75.9          | 95.2          | 94.6          | 88.9          | 129.3         | 125.6         | 122.2         | 107.4         | 100.7         | 104.8         | 2.95731E-05   |
| P12023               | App          | 77.7          | 82.7          | 76.3          | 97.1          | 95.9          | 95.5          | 119.1         | 122           | 119           | 109.2         | 99.8          | 105.7         | 4.05129E-05   |
| Q3UA16               | Spc25        | 94.1          | 97            | 98.7          | 117.4         | 111.4         | 112.6         | 81.7          | 86            | 87.7          | 106           | 102.8         | 104.7         | 7.93899E-05   |
| B2RWS6               | Ep300        | 116.8         | 109.9         | 110.2         | 125.6         | 116           | 117.3         | 73.2          | 67.8          | 77.6          | 90            | 96.1          | 99.5          | 9.95431E-05   |
| P56390               | Cks2         | 85.5          | 81.1          | 77.1          | 126.7         | 127.3         | 119.4         | 74.7          | 73.4          | 78.6          | 118.2         | 115.5         | 122.3         | 2.24605E-05   |
| Q8BFY7               | Pimreg       | 89.2          | 96.8          | 89            | 121.9         | 118.4         | 119.3         | 75.1          | 73            | 73.5          | 113.2         | 118.3         | 112.3         | 1.76997E-05   |
| Q62313               | Tgoln1       | 60.6          | 66.9          | 59.5          | 101.4         | 91            | 90.9          | 139           | 128.5         | 138.1         | 109.8         | 102.6         | 111.7         | 3.49561E-05   |

| Protein<br>Accession | Gene<br>Name | Control-<br>1 | Control-<br>2 | Control-<br>3 | APAP<br>100-1 | APAP<br>100-2 | APAP<br>100-3 | APAP<br>500-1 | APAP<br>500-2 | APAP<br>500-3 | APAP-<br>HU-1 | APAP-<br>HU-2 | APAP-<br>HU-3 | Adjust pvalue |
|----------------------|--------------|---------------|---------------|---------------|---------------|---------------|---------------|---------------|---------------|---------------|---------------|---------------|---------------|---------------|
| Q8C6I2               | Sdhaf2       | 76.8          | 77.7          | 79.6          | 93            | 91.3          | 96.3          | 125.8         | 121.4         | 127.6         | 104.2         | 97.7          | 108.6         | 4.01765E-05   |
| O35955               | Psmb10       | 106.1         | 104           | 107.6         | 109           | 107.3         | 108.3         | 77            | 85.1          | 85.5          | 103.1         | 104.4         | 102.5         | 9.21497E-05   |
| Q3URE1               | Acsf3        | 88.7          | 91.9          | 92.3          | 94.5          | 92.2          | 91.2          | 115.6         | 121.6         | 120.5         | 97.3          | 98.1          | 96.2          | 2.76658E-05   |
| Q9CZL5               | Pcbd2        | 85.9          | 87.7          | 90.8          | 96.5          | 93.6          | 93            | 116.6         | 118           | 117           | 100.5         | 97.8          | 102.4         | 2.58974E-05   |
| Q8R0F8               | Fahd1        | 98.7          | 100.1         | 103.5         | 81.8          | 78.5          | 81            | 126.9         | 131.8         | 125.8         | 94.8          | 85.6          | 91.4          | 2.53608E-05   |
| A1L314               | Mpeg1        | 122.8         | 119.5         | 125.1         | 104.9         | 101.4         | 98.2          | 75.4          | 77.6          | 78.3          | 99.7          | 99.5          | 97.5          | 1.63466E-05   |
| O35316               | Slc6a6       | 146.7         | 142.7         | 150.3         | 96.3          | 100.2         | 103.3         | 65.1          | 67.3          | 69.2          | 84.5          | 86.3          | 88.1          | 2.35904E-06   |
| O55003               | Bnip3        | 156.7         | 158.6         | 164.7         | 105.3         | 101.8         | 102.2         | 50            | 60            | 58.4          | 78.4          | 81.6          | 82.4          | 2.20093E-06   |
|                      | Tmem10       |               |               |               |               |               |               |               |               |               |               |               |               |               |
| Q8VC04               | 6a           | 79.1          | 82            | 84.5          | 111.5         | 113.3         | 111.1         | 88.2          | 96.9          | 95.8          | 110.2         | 114.7         | 112.7         | 6.15936E-05   |
| P15702               | Spn          | 76.9          | 77            | 77.9          | 130.6         | 112.9         | 118.1         | 80.2          | 82.9          | 86.6          | 117.3         | 117.3         | 122.2         | 8.44185E-05   |
| Q8K370               | Acad10       | 87.9          | 89.4          | 91            | 96.3          | 98.7          | 91.6          | 112.2         | 117.7         | 115.4         | 100.1         | 100.6         | 98.9          | 8.99377E-05   |
| Q8CIM3               | D2hgdh       | 84.7          | 88            | 83.7          | 88.8          | 85.8          | 90.4          | 129.6         | 131.2         | 125.5         | 100.9         | 94.3          | 97.2          | 1.76997E-05   |
| Q08297               | Rad51        | 80.9          | 84            | 81.6          | 106.6         | 103.6         | 102.3         | 110.8         | 109.6         | 106.6         | 106.1         | 103.1         | 104.9         | 2.58974E-05   |
| Q8C0L8               | Cog5         | 89.8          | 82.4          | 91.3          | 84.5          | 89.8          | 87.9          | 127.3         | 130.5         | 131.6         | 89.6          | 96.8          | 98.5          | 4.63182E-05   |
| Q9D6V8               | Paip2        | 85.1          | 83.2          | 81.8          | 132.9         | 120.6         | 130.8         | 76.5          | 67.5          | 72.9          | 120.3         | 116.8         | 111.7         | 3.63605E-05   |
| P43024               | Cox6a1       | 79.1          | 80.1          | 82.5          | 100.1         | 99.5          | 93            | 116.6         | 117.5         | 114.6         | 108           | 102.3         | 106.7         | 4.19587E-05   |
| P36371               | Tap2         | 90.3          | 88.7          | 89.4          | 94.4          | 95.3          | 96.3          | 115.4         | 120.5         | 118.7         | 94.8          | 98.2          | 98.2          | 1.76997E-05   |
| Q9DCA2               | Mrps11       | 93.2          | 93.9          | 91            | 91.1          | 90.9          | 91.8          | 112.4         | 120.7         | 118.6         | 96.4          | 99.3          | 100.6         | 7.3578E-05    |
| E9Q5F9               | Setd2        | 110.3         | 103.7         | 108.3         | 112.3         | 110.3         | 109.9         | 77.7          | 79.1          | 82.8          | 97.9          | 104.1         | 103.6         | 6.33677E-05   |
| Q91ZW2               | Pofut1       | 88.7          | 90.9          | 94.4          | 87.9          | 96.4          | 93.5          | 123.2         | 125.3         | 117.4         | 94.3          | 94.1          | 94            | 9.47877E-05   |
| Q9D9Z1               | Knstrn       | 103.1         | 104.3         | 104.6         | 132.4         | 120.2         | 127.9         | 61.5          | 67.2          | 69.5          | 100.2         | 103.7         | 105.5         | 2.58974E-05   |
| Q9CR10               | Oxld1        | 84.4          | 89.4          | 89.9          | 91.2          | 82            | 83.8          | 128.2         | 131.9         | 135.2         | 94.3          | 94.3          | 95.3          | 2.57497E-05   |

| Protein<br>Accession | Gene<br>Name | Control-<br>1 | Control-<br>2 | Control-<br>3 | APAP<br>100-1 | APAP<br>100-2 | APAP<br>100-3 | APAP<br>500-1 | APAP<br>500-2 | APAP<br>500-3 | APAP-<br>HU-1 | APAP-<br>HU-2 | APAP-<br>HU-3 | Adjust pvalue |
|----------------------|--------------|---------------|---------------|---------------|---------------|---------------|---------------|---------------|---------------|---------------|---------------|---------------|---------------|---------------|
| Q9CYW4               | Hdhd3        | 75.3          | 81.8          | 81.3          | 95.7          | 86.3          | 82.6          | 125.1         | 137.1         | 136.1         | 100           | 98.4          | 100.4         | 8.29599E-05   |
| Q922B1               | Macrodl      | 94.1          | 90.4          | 99.2          | 84.3          | 82.9          | 82.8          | 127.3         | 133.9         | 126.3         | 89.9          | 94.6          | 94.3          | 2.95731E-05   |
| Q3V1T4               | P3h1         | 77.1          | 79.2          | 78.1          | 86.2          | 89.3          | 93.2          | 126.3         | 139.1         | 135.2         | 96.2          | 99.3          | 100.9         | 2.95731E-05   |
| Q9CR86               | Carhsp1      | 74.2          | 74.8          | 77            | 96.1          | 98.4          | 95            | 122.6         | 127.2         | 131.8         | 103           | 99.8          | 100.2         | 1.50383E-05   |
| Q3UUI3               | Them4        | 86.1          | 88.3          | 87.8          | 92.4          | 87.1          | 90.1          | 127.6         | 128.7         | 132.6         | 91.2          | 94.3          | 93.8          | 6.85351E-06   |
| Q9D023               | Mpc2         | 71.3          | 78.9          | 77.3          | 93.8          | 94.4          | 90            | 125.1         | 129.6         | 131.1         | 99.8          | 98.6          | 110.1         | 4.92042E-05   |
| Q91VE0               | Slc27a4      | 90.9          | 82.6          | 89.9          | 79.9          | 92            | 89.7          | 132.5         | 136.7         | 130.6         | 86.6          | 93            | 95.7          | 8.08272E-05   |
| Q7TMF2               | Eri1         | 130.1         | 126.9         | 138.1         | 100.7         | 94.4          | 102.6         | 82.9          | 81.5          | 79            | 84.3          | 92.5          | 86.9          | 4.8877E-05    |
| P47930               | Fosl2        | 105.3         | 100.2         | 105.6         | 114.6         | 110           | 109.4         | 73.8          | 78            | 81.9          | 104.3         | 108.2         | 108.7         | 7.00366E-05   |
| Q9WTX2               | Prkra        | 86.4          | 84.8          | 86.8          | 93            | 91.6          | 91.2          | 126.1         | 124.5         | 123           | 95.8          | 98.3          | 98.6          | 1.9039E-06    |
| O70201               | Birc5        | 82.6          | 85.6          | 88.3          | 125.9         | 119.1         | 123.8         | 76            | 83.2          | 80            | 116.3         | 113.7         | 105.4         | 5.37986E-05   |
| Q3UDW8               | Hgsnat       | 82.2          | 69.7          | 80.5          | 79.9          | 90.2          | 81.1          | 146.7         | 170.1         | 150.9         | 80.2          | 82.3          | 86.2          | 7.00366E-05   |
| Q9CZI9               | Aen          | 90.1          | 89.9          | 88.2          | 107.7         | 104           | 106.8         | 98.7          | 99.7          | 102.1         | 103.3         | 104.2         | 105.2         | 5.67837E-05   |
| P63030               | Mpc1         | 74.9          | 76.1          | 80.9          | 98            | 92.1          | 89.4          | 127.5         | 130.5         | 131.2         | 99            | 95.4          | 105.1         | 3.49561E-05   |
| Q7TSY8               | Sgo2         | 132.6         | 132.6         | 127.7         | 113           | 107.1         | 115           | 65.9          | 56.8          | 59.3          | 98.3          | 96.6          | 95.2          | 1.09895E-05   |
| P22518               | Clk1         | 65.3          | 69            | 64            | 72.1          | 77.7          | 84.6          | 164.6         | 155.3         | 146.1         | 103.3         | 98.8          | 99            | 2.24372E-05   |
| Q9ERH4               | Nusap1       | 84.1          | 88.8          | 82.7          | 132.9         | 121.1         | 124.1         | 76.5          | 77.6          | 80.6          | 108.4         | 114.3         | 109           | 4.05129E-05   |
| Q3U2A8               | Vars2        | 102.8         | 98.2          | 104.4         | 84.9          | 89.3          | 86.7          | 126.4         | 120.4         | 123.4         | 82.9          | 90.3          | 90.4          | 4.97766E-05   |
| Q9CZN8               | Qrs11        | 94.5          | 92.2          | 92.5          | 98.9          | 92.6          | 92.7          | 112.1         | 115.9         | 115.5         | 97.2          | 97.4          | 98.6          | 9.2914E-05    |
| Q8CFV9               | Rfk          | 73.5          | 77.7          | 84.8          | 92.8          | 99.9          | 93.7          | 125.6         | 127.3         | 132.7         | 96.5          | 97            | 98.5          | 4.82617E-05   |
| Q3UHH1               | Zswim8       | 86.9          | 87            | 85.9          | 86.2          | 94.5          | 90.1          | 119.1         | 125.8         | 121.5         | 99.6          | 99.4          | 103.9         | 4.61936E-05   |
| P97783               | Mllt11       | 57.6          | 67.3          | 56.7          | 83            | 68.1          | 66            | 115.7         | 107.3         | 120.3         | 155.2         | 157.9         | 144.8         | 3.51792E-05   |
| Q9CR46               | Ska2         | 66.2          | 66.8          | 68.9          | 124.8         | 111.8         | 116.6         | 86            | 88.1          | 92.7          | 124.9         | 124.1         | 128.9         | 2.22534E-05   |

| Protein<br>Accession | Gene<br>Name | Control-<br>1 | Control-<br>2 | Control-<br>3 | APAP<br>100-1 | APAP<br>100-2 | APAP<br>100-3 | APAP<br>500-1 | APAP<br>500-2 | APAP<br>500-3 | APAP-<br>HU-1 | APAP-<br>HU-2 | APAP-<br>HU-3 | Adjust pvalue |
|----------------------|--------------|---------------|---------------|---------------|---------------|---------------|---------------|---------------|---------------|---------------|---------------|---------------|---------------|---------------|
| Q8C0L0               | Tmx4         | 75.5          | 81.6          | 82            | 90.4          | 87.3          | 91.4          | 129.9         | 133.8         | 133.4         | 99.6          | 96.6          | 98.4          | 7.18133E-06   |
| Q9CXY9               | Pigk         | 90            | 81.4          | 88.5          | 93.3          | 91.9          | 91.5          | 124.1         | 132.5         | 120.6         | 96            | 94.2          | 96            | 8.76837E-05   |
| Q8VD57               | Sft2d2       | 73.8          | 77.3          | 78.7          | 92            | 97.5          | 90.9          | 127.3         | 129.2         | 132           | 96            | 100.8         | 104.5         | 2.22534E-05   |
| Q8BH51               | Cox14        | 74.8          | 72.1          | 76.5          | 91.5          | 102           | 88.6          | 144.2         | 137.4         | 139.2         | 90.9          | 89.1          | 93.6          | 2.26247E-05   |
| Q9D0P0               | Ebpl         | 76.5          | 74.2          | 77.2          | 86.9          | 90.9          | 89.7          | 136.9         | 138.8         | 129.9         | 100.8         | 94.9          | 103.3         | 1.756E-05     |
| Q00623               | Apoa1        | 45            | 46.3          | 44.5          | 49.4          | 52.3          | 52.8          | 155.8         | 190.1         | 170.8         | 145           | 108.6         | 139.4         | 7.24382E-05   |
| Q99MK9               | Rassf1       | 73.6          | 72.5          | 72.7          | 119.5         | 126.1         | 116.4         | 82.8          | 95.4          | 93.4          | 111.7         | 117.4         | 118.5         | 6.54149E-05   |
| P51943               | Ccna2        | 75.8          | 79.8          | 75            | 126.7         | 124.2         | 126.4         | 76.3          | 80.9          | 87.6          | 116.6         | 121.5         | 109.4         | 4.16232E-05   |
| Q8CAK1               | Iba57        | 67.9          | 66.4          | 72            | 84.7          | 89.7          | 81.1          | 139.6         | 164           | 158.4         | 89.1          | 94.2          | 92.9          | 4.65824E-05   |
| Q8BHD8               | Pcmtd2       | 84.3          | 79.6          | 90.7          | 79.3          | 85.9          | 82.3          | 138.7         | 149.8         | 139.6         | 85.7          | 93.1          | 91            | 3.25629E-05   |
| Q8BJ56               | Pnpla2       | 72.8          | 75.7          | 87.4          | 72            | 80.8          | 75.4          | 154.5         | 173.4         | 158.6         | 74.4          | 86            | 89            | 4.47401E-05   |
| B1B212               | H60b         | 65.7          | 66.8          | 69.7          | 119.6         | 108.3         | 110.2         | 93.5          | 91.2          | 91.1          | 136.9         | 117.9         | 129.1         | 8.54099E-05   |
| Q3TC33               | Ccdc127      | 74.1          | 73.7          | 87.8          | 88.6          | 88.8          | 88.1          | 147.2         | 135           | 132.5         | 94.3          | 92.6          | 97.4          | 8.25969E-05   |
|                      | D10Wsu       |               |               |               |               |               |               |               |               |               |               |               |               |               |
| Q9CX66               | 102e         | 97.4          | 94            | 97.9          | 130.5         | 120.4         | 121.7         | 72.7          | 77.3          | 79.9          | 103.9         | 104.5         | 99.8          | 4.65824E-05   |
| Q9DAC7               | Ttc32        | 109.3         | 111.2         | 111.6         | 118.7         | 107.8         | 116.1         | 72.6          | 69.5          | 75.3          | 103.4         | 100.2         | 104.3         | 4.16232E-05   |
| Q8VDV3               | Rab3il1      | 129.5         | 127.8         | 129.6         | 98.2          | 92.4          | 97.9          | 85.6          | 87.3          | 89.3          | 83.4          | 91.5          | 87.6          | 1.96502E-05   |
| Q9CRY7               | Gdpl1        | 77.9          | 72.7          | 85            | 91.5          | 96.8          | 90.8          | 125.7         | 140.3         | 132.9         | 92.8          | 96.6          | 97.2          | 9.19668E-05   |
| Q3UMR5               | Mcu          | 92.3          | 84.7          | 87            | 87.9          | 91.3          | 89.8          | 122.8         | 128.2         | 121.4         | 99.1          | 98.2          | 97.4          | 3.16777E-05   |
| Q61070               | Ei24         | 77            | 73.8          | 81.8          | 88.1          | 89.4          | 86.7          | 144.5         | 137.7         | 131.3         | 95.8          | 96.1          | 97.6          | 2.24605E-05   |
| Q9JKK7               | Tmod2        | 45.5          | 47.2          | 47.1          | 57.1          | 61.3          | 58.2          | 174.9         | 198.5         | 175.3         | 122.7         | 91.5          | 120.6         | 4.06613E-05   |
| Q9Z1X9               | Cdc45        | 61.8          | 60.8          | 59.6          | 67.8          | 69.4          | 61.7          | 140.7         | 157.3         | 162.9         | 131.4         | 107           | 119.6         | 5.24253E-05   |
| Q8BG21               | Cacfd1       | 84.2          | 80.7          | 82.6          | 81.4          | 86.8          | 89.6          | 135.3         | 139.8         | 130.3         | 99.3          | 92.9          | 97            | 2.33456E-05   |



| Protein<br>Accession | Gene<br>Name | Control-<br>1 | Control-<br>2 | Control-<br>3 | APAP<br>100-1 | APAP<br>100-2 | APAP<br>100-3 | APAP<br>500-1 | APAP<br>500-2 | APAP<br>500-3 | APAP-<br>HU-1 | APAP-<br>HU-2 | APAP-<br>HU-3 | Adjust pvalue |
|----------------------|--------------|---------------|---------------|---------------|---------------|---------------|---------------|---------------|---------------|---------------|---------------|---------------|---------------|---------------|
| P98197               | Atp11a       | 74.9          | 75.9          | 76.5          | 94.9          | 101.4         | 92.2          | 125.4         | 122           | 125.2         | 105.3         | 99.7          | 106.6         | 2.61375E-05   |
| Q91V16               | Etfrf1       | 47.9          | 51.8          | 50            | 86.9          | 82.6          | 81.5          | 160.1         | 146.1         | 159.6         | 114.9         | 101.1         | 117.4         | 1.76997E-05   |
| A2A559               | Pgap3        | 77.3          | 81.8          | 81.4          | 86.6          | 85.4          | 86.1          | 128.9         | 137.1         | 125.9         | 100.9         | 100.7         | 108           | 3.09416E-05   |
| Q9Z1T6               | Pikfyve      | 85.5          | 81.2          | 98.2          | 123.4         | 128.6         | 128.8         | 73.9          | 73.5          | 77.7          | 107.4         | 113           | 108.9         | 8.38065E-05   |
| Q9DCI3               | Stard3nl     | 75.2          | 75.9          | 82.6          | 101.7         | 95.6          | 94.3          | 127.3         | 122.2         | 119.8         | 103.1         | 99.8          | 102.5         | 4.8877E-05    |
| Q5NCE8               | Mrs2         | 89.5          | 87.2          | 85.7          | 100.7         | 98.8          | 100.1         | 112.9         | 118.3         | 112.4         | 99.1          | 94.9          | 100.4         | 8.23222E-05   |
| O88939               | Zbtb7a       | 125.6         | 125.6         | 138.3         | 100.1         | 101.3         | 106.7         | 68.4          | 70.8          | 74.3          | 96.7          | 97.8          | 94.4          | 4.29071E-05   |
| Q9CQ00               | Dmac1        | 70.7          | 80.1          | 76.4          | 90.3          | 91.8          | 83.5          | 140.6         | 136.7         | 138           | 99.1          | 92.7          | 100.1         | 2.05287E-05   |
| Q9D818               | Sapcd2       | 139           | 148.2         | 151.4         | 98.7          | 107.2         | 93.4          | 54.7          | 70.4          | 62.8          | 96.4          | 93.3          | 84.5          | 5.8088E-05    |
| Q14CH7               | Aars2        | 86.9          | 84.7          | 87.8          | 88.7          | 86.6          | 87.2          | 124.9         | 140.4         | 127.8         | 92            | 95.8          | 97.3          | 7.31812E-05   |
| Q60611               | Satb1        | 92.6          | 100.1         | 101.4         | 80.2          | 76.2          | 76.5          | 123.3         | 115.3         | 119.6         | 109           | 101.1         | 104.8         | 8.72476E-05   |
| Q920Q8               | Ivns1abp     | 147.9         | 138.7         | 146.3         | 81.4          | 91.1          | 97.6          | 83.4          | 82.7          | 81.4          | 78.4          | 90.4          | 80.8          | 5.12469E-05   |
| Q9DBH0               | Wwp2         | 150.7         | 130           | 148.2         | 89.6          | 95.7          | 94.8          | 79.2          | 81            | 78.6          | 81.2          | 82.6          | 88.3          | 7.3578E-05    |
| O09126               | Sema4d       | 138.5         | 143           | 137.1         | 107.7         | 110.1         | 106.3         | 52.9          | 54.3          | 58.7          | 94.5          | 97.1          | 99.9          | 1.9039E-06    |
| Q8BZ36               | Rint1        | 107.4         | 105.4         | 106.7         | 103           | 102.7         | 100.6         | 92.1          | 94.8          | 94.6          | 97.1          | 98.8          | 96.8          | 9.6261E-05    |
| Q99PL7               | Scd3         | 148.5         | 140.7         | 153.5         | 98.5          | 111.2         | 107.5         | 57.9          | 68            | 67.4          | 80.8          | 84.4          | 81.7          | 2.38593E-05   |
| Q01339               | Apoh         | 16.6          | 17.1          | 11.6          | 23.8          | 31.7          | 25.9          | 248.7         | 275.8         | 210.1         | 130.9         | 95.5          | 112.3         | 4.05129E-05   |
| P60603               | Romo1        | 76.1          | 75.6          | 81.8          | 89.2          | 95.4          | 89.1          | 131.3         | 133.8         | 131.6         | 102.3         | 96.6          | 97.1          | 1.69427E-05   |
| Q8K2T4               | Uqcc3        | 78.6          | 79.7          | 84            | 93            | 97.7          | 85.9          | 119.7         | 117.6         | 122           | 109.3         | 104.5         | 108           | 7.93899E-05   |
| Q9JKY5               | Hip1r        | 76.2          | 83.2          | 71.8          | 133.6         | 140.9         | 124.3         | 77.3          | 69.3          | 83.3          | 114.4         | 111.5         | 114.2         | 8.88647E-05   |

**Table S2    Localization of differentially expressed proteins in macrophages**

| <b>Protein Accession No.</b> | <b>Location</b>                                   | <b>MW [kDa]</b> | <b>calc. pI</b> |
|------------------------------|---------------------------------------------------|-----------------|-----------------|
| Q8BTM8                       | cytoplasm; extracellular                          | 281             | 6.04            |
| E9PVX6                       | nucleus                                           | 350.7           | 9.72            |
| P16546                       | cytoplasm; cell membrane;<br>cytoskeleton         | 284.4           | 5.33            |
| P09103                       | cell membrane; endoplasmic<br>reticulum           | 57              | 4.88            |
| P23116                       | cytoplasm; nucleus                                | 161.8           | 6.77            |
| Q6P5E4                       | endoplasmic reticulum; Golgi<br>apparatus         | 176.3           | 5.62            |
| Q8CAQ8                       | mitochondria                                      | 83.8            | 6.61            |
| Q8VHX6                       | cell membrane; cytoskeleton                       | 290.9           | 5.95            |
| Q03265                       | cell membrane; mitochondria                       | 59.7            | 9.19            |
| Q01320                       | cytoplasm; nucleus                                | 172.7           | 8.6             |
| Q8BFR5                       | mitochondria                                      | 49.5            | 7.56            |
| Q91YQ5                       | cytoplasm; endoplasmic reticulum                  | 68.5            | 6.46            |
| Q3U0V1                       | cytoplasm; nucleus                                | 76.7            | 7.33            |
| Q8CGK3                       | cytoplasm; mitochondria                           | 105.8           | 6.57            |
| P49710                       | mitochondria                                      | 54.2            | 4.84            |
| P26443                       | mitochondria; endoplasmic<br>reticulum            | 61.3            | 8               |
| Q9CQN1                       | nucleus; mitochondria                             | 80.2            | 6.68            |
| Q7TMK9                       | cytoplasm; nucleus; endoplasmic<br>reticulum      | 69.6            | 8.59            |
| Q922J3                       | cytoplasm; nucleus; cytoskeleton                  | 155.7           | 5.24            |
| Q9QZQ1                       | cytoplasm; cell membrane;<br>nucleus              | 206.4           | 6.32            |
| P30416                       | cytoplasm; nucleus;<br>mitochondria; cytoskeleton | 51.5            | 5.72            |
| P61979                       | cytoplasm; nucleus                                | 50.9            | 5.54            |
| P18242                       | extracellular; mitochondria;<br>lysosomes         | 44.9            | 7.15            |
| Q8BG05                       | cytoplasm; nucleus                                | 39.6            | 9.01            |
| Q99MR6                       | cytoplasm; nucleus                                | 100.4           | 5.97            |
| P08249                       | cytoplasm; mitochondria                           | 35.6            | 8.68            |
| Q9EQP2                       | cell membrane; endoplasmic<br>reticulum           | 61.4            | 6.76            |
| Q9Z2I8                       | cell membrane; mitochondria                       | 46.8            | 7.02            |
| O70318                       | cytoplasm; cell membrane;<br>cytoskeleton         | 109.9           | 5.43            |
| Q8VIJ6                       | cytoplasm; nucleus                                | 75.4            | 9.44            |
| Q8BHN3                       | endoplasmic reticulum; Golgi                      | 106.8           | 6.06            |

|        |                                                       |       |      |
|--------|-------------------------------------------------------|-------|------|
|        | apparatus                                             |       |      |
| Q60597 | nucleus; mitochondria                                 | 116.4 | 6.83 |
| Q04447 | cytoplasm; extracellular;<br>mitochondria             | 42.7  | 5.67 |
| Q9Z1Z2 | cytoplasm; nucleus                                    | 38.4  | 5.12 |
| Q6A068 | cytoplasm; nucleus                                    | 92.1  | 8.02 |
| P10605 | cytoplasm; cell membrane;<br>extracellular; lysosomes | 37.3  | 5.91 |
| Q99L45 | cytoplasm                                             | 38.1  | 5.8  |
| P30681 | cytoplasm; extracellular; nucleus                     | 24.1  | 7.31 |
| P47738 | mitochondria                                          | 56.5  | 7.62 |
| Q99LC5 | cytoplasm; mitochondria                               | 35    | 8.38 |
| Q8QZT1 | mitochondria                                          | 44.8  | 8.51 |
| Q8BWT1 | mitochondria                                          | 41.8  | 8.09 |
| Q8K1B8 |                                                       | 75.6  | 7.05 |
| Q60932 | cell membrane; mitochondria                           | 32.3  | 8.43 |
| Q6A028 | cytoplasm; cell membrane;<br>nucleus; cytoskeleton    | 69    | 6.05 |
| Q9CVB6 | cytoplasm; nucleus; cytoskeleton                      | 34.3  | 7.36 |
| Q6GQT9 | endoplasmic reticulum                                 | 133.3 | 6.09 |
| Q91WQ3 | cytoplasm; nucleus                                    | 59.1  | 7.01 |
| P63158 | cytoplasm; cell membrane;<br>extracellular; nucleus   | 24.9  | 5.74 |
| Q8QZY1 | cytoplasm; nucleus                                    | 66.6  | 6.44 |
| P17918 | nucleus                                               | 28.8  | 4.77 |
| Q7TSC1 | cytoplasm; nucleus                                    | 229.1 | 9.39 |
| P05202 | cell membrane; mitochondria                           | 47.4  | 9    |
| Q99K85 | cytoplasm                                             | 40.4  | 8.03 |
| P54071 | cytoplasm; mitochondria                               | 50.9  | 8.69 |
| P67778 | cytoplasm; cell membrane;<br>nucleus; mitochondria    | 29.8  | 5.76 |
| P68510 | cytoplasm; cell membrane                              | 28.2  | 4.89 |
| P62814 | cytoplasm; cell membrane                              | 56.5  | 5.81 |
| Q9CZU6 | mitochondria                                          | 51.7  | 8.57 |
| P51881 | mitochondria                                          | 32.9  | 9.73 |
| Q9R1T2 | cytoplasm; nucleus                                    | 38.6  | 5.36 |
| P11157 | cytoplasm; nucleus                                    | 45.1  | 5.45 |
| P21550 | cytoplasm; cell membrane                              | 47    | 7.18 |
| Q8BH59 | mitochondria                                          | 74.5  | 8.25 |
| Q99L47 | cytoplasm                                             | 41.6  | 5.26 |
| O35857 | mitochondria                                          | 51.1  | 8.13 |
| Q8BH04 | cytoplasm; mitochondria                               | 70.5  | 7.28 |
| P50544 | nucleus; mitochondria                                 | 70.8  | 8.75 |

|        |                                                  |       |      |
|--------|--------------------------------------------------|-------|------|
| Q8BK64 | cytoplasm; endoplasmic reticulum                 | 38.1  | 5.53 |
| Q9WVA4 |                                                  | 22.4  | 8.24 |
| Q91VH2 | cytoplasm; cell membrane; Golgi apparatus        | 66.5  | 5.52 |
| Q922U1 | cytoplasm; nucleus                               | 77.4  | 9.5  |
| P25976 | nucleus                                          | 89.5  | 5.76 |
| Q8R180 | endoplasmic reticulum                            | 54.1  | 6.54 |
| Q60668 | cytoplasm; nucleus                               | 38.3  | 7.81 |
| D3Z7P3 | cytoplasm; mitochondria                          | 73.9  | 7.99 |
| Q9DCN2 | cytoplasm; mitochondria; endoplasmic reticulum   | 34.1  | 8.38 |
| Q8BI84 | mitochondria; endoplasmic reticulum              | 213.5 | 4.75 |
| Q6A065 | cytoplasm; cytoskeleton                          | 174.9 | 7.17 |
| O35841 | cytoplasm; nucleus                               | 56.8  | 5.92 |
| Q60865 | cytoplasm                                        | 78.1  | 5.25 |
| P48722 | cytoplasm; nucleus                               | 94.3  | 5.74 |
| Q07076 | cytoplasm; cell membrane; nucleus                | 49.9  | 6.18 |
| Q6P9P6 | cytoplasm; nucleus                               | 118   | 6    |
| Q925I1 | mitochondria                                     | 66.7  | 9.29 |
| P29758 | cytoplasm; nucleus; mitochondria; cytoskeleton   | 48.3  | 6.62 |
| Q8K297 | endoplasmic reticulum                            | 71    | 7.28 |
| Q810A7 | cytoplasm; nucleus                               | 101.9 | 6.98 |
| P10711 | nucleus                                          | 33.9  | 8.38 |
| Q8C1B7 | cytoplasm; cytoskeleton                          | 49.7  | 6.68 |
| Q8K298 | cytoplasm; nucleus; cytoskeleton                 | 122.7 | 6.98 |
| Q91VX2 | cytoplasm; nucleus                               | 117.9 | 7.72 |
| Q8BNW9 |                                                  | 67.9  | 5.39 |
| O08808 | cytoplasm; cell membrane; nucleus; cytoskeleton  | 139.3 | 5.57 |
| Q9DCX2 | mitochondria                                     | 18.7  | 5.69 |
| Q99KQ4 | cytoplasm; cell membrane; extracellular; nucleus | 55.4  | 7.15 |
| Q99JY0 | mitochondria; endoplasmic reticulum              | 51.4  | 9.38 |
| Q922Q8 | endoplasmic reticulum                            | 34.9  | 9.52 |
| P46664 | cytoplasm; mitochondria                          | 50    | 6.38 |
| P11440 | cytoplasm; nucleus; mitochondria; cytoskeleton   | 34.1  | 8.43 |
| Q9D051 | cytoplasm; mitochondria                          | 38.9  | 6.87 |
| Q5SSZ5 | cytoplasm                                        | 155.5 | 6.65 |

|        |                                                   |       |      |
|--------|---------------------------------------------------|-------|------|
| Q9CQW2 | cytoplasm; lysosomes                              | 21.5  | 8.43 |
| A2APB8 | cytoplasm; extracellular; nucleus                 | 85.8  | 9.38 |
| Q5SXY1 | cytoplasm; cell membrane;<br>nucleus              | 118   | 6.64 |
| P51174 | mitochondria                                      | 47.9  | 8.31 |
| Q9ESZ8 | cytoplasm; nucleus                                | 112.2 | 6.55 |
| P23198 | nucleus                                           | 20.8  | 5.22 |
| Q9DCW4 | mitochondria                                      | 27.6  | 8.1  |
| Q9D0F3 | endoplasmic reticulum; Golgi<br>apparatus         | 57.8  | 6.34 |
| Q6NZF1 |                                                   | 86.4  | 8.13 |
| P10404 | cell membrane                                     | 69.6  | 7.96 |
| O08795 | endoplasmic reticulum                             | 58.8  | 4.46 |
| Q9Z2I9 | mitochondria                                      | 50.1  | 7.01 |
| Q9DBH5 | extracellular; Golgi apparatus                    | 40.4  | 6.95 |
| Q3TIV5 | cytoplasm; nucleus                                | 48.3  | 5.3  |
| P98078 | cytoplasm; cell membrane;<br>nucleus              | 82.3  | 6.1  |
| Q8BVE3 |                                                   | 55.8  | 6.61 |
| Q9DC61 | mitochondria                                      | 58.2  | 6.83 |
| Q60930 | mitochondria                                      | 31.7  | 7.49 |
| Q9CYN2 | endoplasmic reticulum                             | 25    | 8.57 |
| P32020 | cytoplasm; mitochondria;<br>endoplasmic reticulum | 59.1  | 7.44 |
| Q8C129 | cytoplasm; cell membrane                          | 117.2 | 5.96 |
| Q6PGB6 | cytoplasm; nucleus                                | 19.4  | 8.81 |
| P35979 | cytoplasm; nucleus                                | 17.8  | 9.42 |
| Q3UKJ7 | cytoplasm; nucleus                                | 57.5  | 7.18 |
| P59328 | nucleus                                           | 124.2 | 5.63 |
| Q60715 | mitochondria; endoplasmic<br>reticulum            | 60.9  | 5.9  |
| O35639 | cytoplasm; cell membrane                          | 36.4  | 5.76 |
| P39749 | nucleus; mitochondria                             | 42.3  | 8.34 |
| Q8VEH3 | cytoplasm; cytoskeleton;<br>lysosomes             | 21.4  | 7.77 |
| Q9Z130 | cytoplasm; nucleus                                | 33.5  | 7.31 |
| Q9JJU8 |                                                   | 12.8  | 4.92 |
| P59325 | cytoplasm; cell membrane                          | 48.9  | 5.52 |
| P97377 | cytoplasm; nucleus; cytoskeleton                  | 39    | 8.54 |
| Q00547 | cytoplasm; cytoskeleton                           | 91.7  | 5.52 |
| Q920E5 | cytoplasm                                         | 40.6  | 5.66 |
| Q9EQH2 | endoplasmic reticulum                             | 106.5 | 6.2  |
| Q8R5A3 | cell membrane; cytoskeleton                       | 74.3  | 5.35 |

|        |                                                    |       |      |
|--------|----------------------------------------------------|-------|------|
| Q9D2G2 | nucleus; mitochondria                              | 49    | 8.95 |
| P28650 | cytoplasm                                          | 50.2  | 8.43 |
| Q61941 | mitochondria                                       | 113.8 | 7.64 |
| Q8VEM8 | mitochondria                                       | 39.6  | 9.26 |
| Q922Q4 | cytoplasm; mitochondria                            | 33.6  | 7.77 |
| P45952 | mitochondria                                       | 46.5  | 8.37 |
| P51863 | lysosomes                                          | 40.3  | 5    |
| O09159 | lysosomes                                          | 114.6 | 8.13 |
| Q60931 | mitochondria                                       | 30.7  | 8.79 |
| Q9CR68 | mitochondria                                       | 29.3  | 8.7  |
| Q80U78 | cytoplasm                                          | 126.5 | 6.86 |
| Q9D1J3 | nucleus                                            | 23.5  | 6.65 |
| Q9QYG0 | cytoplasm                                          | 40.8  | 5.4  |
| Q9DCS9 | mitochondria                                       | 21    | 8.03 |
| P35486 | mitochondria                                       | 43.2  | 8.19 |
| Q921G7 | mitochondria                                       | 68    | 7.58 |
| Q91WN1 | cytoplasm; cell membrane;<br>nucleus               | 30    | 5.94 |
| Q6RT24 | cytoplasm; cytoskeleton                            | 286.3 | 5.31 |
| P35293 | cell membrane                                      | 23    | 5.36 |
| Q8JZQ2 | mitochondria                                       | 89.5  | 8.6  |
| P19536 | mitochondria                                       | 13.8  | 8.38 |
| P31266 | cytoplasm; nucleus                                 | 58.5  | 8.13 |
| Q62087 | extracellular                                      | 39.3  | 5.74 |
| Q61102 | mitochondria                                       | 82.5  | 9.32 |
| P52293 | cytoplasm; nucleus                                 | 57.9  | 5.68 |
| P97329 | cytoplasm; cytoskeleton; Golgi<br>apparatus        | 99.8  | 6.99 |
| Q9JKB3 | cytoplasm; nucleus                                 | 38.8  | 9.69 |
| O08756 | nucleus; mitochondria                              | 27.4  | 8.41 |
| Q9EP89 | cytoplasm; mitochondria                            | 60.7  | 8.9  |
| Q91ZA3 | mitochondria                                       | 79.9  | 7.25 |
| Q80TM9 | cytoplasm; cell membrane                           | 174.9 | 5.16 |
| Q8C7X2 | endoplasmic reticulum                              | 111.5 | 7.43 |
| Q99MN9 | mitochondria                                       | 58.4  | 7.66 |
| Q3U0V2 | cytoplasm; nucleus; cytoskeleton                   | 34.6  | 5.2  |
| Q07417 | mitochondria                                       | 44.9  | 8.47 |
| Q922V4 | nucleus                                            | 56.9  | 9.17 |
| Q99LP6 | mitochondria                                       | 24.3  | 8.38 |
| P20108 | cytoplasm; mitochondria                            | 28.1  | 7.58 |
| Q99P31 | endoplasmic reticulum                              | 39.1  | 5.36 |
| Q9JLN9 | cytoplasm; nucleus;<br>mitochondria; cytoskeleton; | 288.6 | 7.17 |

|        |                                                            |       |       |
|--------|------------------------------------------------------------|-------|-------|
|        | endoplasmic reticulum;<br>lysosomes; Golgi apparatus       |       |       |
| Q6ZQM8 | endoplasmic reticulum                                      | 59.7  | 8.35  |
| P09671 | cytoplasm; mitochondria                                    | 24.6  | 8.62  |
| P42125 | mitochondria                                               | 32.2  | 8.98  |
| Q9DB20 | mitochondria                                               | 23.3  | 9.99  |
| P48024 |                                                            | 12.7  | 7.44  |
| P33174 | cytoplasm; nucleus; cytoskeleton                           | 139.4 | 6.68  |
| Q8K2C9 | endoplasmic reticulum                                      | 43.1  | 9.13  |
| Q60787 | cytoplasm                                                  | 60.2  | 6.21  |
| Q9DCE5 | nucleus                                                    | 42.1  | 8.47  |
|        | cytoplasm; nucleus;<br>mitochondria; cytoskeleton          |       |       |
| P99029 |                                                            | 21.9  | 8.85  |
| P38060 | mitochondria                                               | 34.2  | 8.41  |
| Q8CGC6 | nucleus                                                    | 84.2  | 9.54  |
| D0QMC3 | nucleus                                                    | 60.5  | 9.28  |
| Q8K268 |                                                            | 79.8  | 6.16  |
| Q8BGT7 | nucleus                                                    | 26.7  | 7.24  |
| A2AJI0 | cytoplasm; cytoskeleton                                    | 93.2  | 10.15 |
| P10922 | nucleus                                                    | 20.8  | 10.9  |
| Q8BH95 | mitochondria                                               | 31.5  | 8.48  |
| Q8K4R9 | cytoplasm; nucleus; cytoskeleton                           | 90.1  | 9.17  |
| Q8BH24 | cell membrane; Golgi apparatus                             | 74.6  | 7.23  |
|        | cytoplasm; cell membrane;<br>mitochondria; Golgi apparatus |       |       |
| Q2TBE6 |                                                            | 54.2  | 8.05  |
| O70503 |                                                            | 34.7  | 9.52  |
| P70227 | endoplasmic reticulum                                      | 304.1 | 6.54  |
| O08915 | cytoplasm                                                  | 37.6  | 6.4   |
| Q9EQ28 | cytoplasm; nucleus                                         | 50.8  | 9.32  |
| P55096 |                                                            | 75.4  | 9.26  |
| Q05117 | lysosomes                                                  | 36.8  | 8.9   |
| O88783 | extracellular                                              | 247.1 | 6.05  |
| Q9JJ11 | cytoplasm; cytoskeleton                                    | 70.6  | 4.61  |
| Q80W54 | nucleus; endoplasmic reticulum                             | 54.7  | 6.95  |
| P97494 | cytoplasm; mitochondria                                    | 72.5  | 5.9   |
| Q80U58 | cytoplasm                                                  | 114.2 | 7.08  |
| Q9JLI6 | cytoplasm; Golgi apparatus                                 | 47.1  | 6.8   |
| Q922S8 | cytoplasm; nucleus; cytoskeleton                           | 81    | 7.97  |
| P52633 | cytoplasm; nucleus                                         | 93.4  | 6.23  |
| Q6ZPY7 | nucleus                                                    | 170.8 | 6.92  |
|        | cytoplasm; cell membrane;<br>nucleus; cytoskeleton         |       |       |
| Q62433 |                                                            | 43    | 6.1   |
| Q8K078 | cell membrane                                              | 77.6  | 7.85  |

|        |                                                 |       |      |
|--------|-------------------------------------------------|-------|------|
| Q9D1E6 | cytoplasm; cytoskeleton                         | 27.4  | 5.24 |
| O88531 | extracellular; lysosomes                        | 34.5  | 8    |
| Q8JZN5 | mitochondria                                    | 68.7  | 7.46 |
| Q8R1V4 | endoplasmic reticulum; Golgi apparatus          | 26    | 8.18 |
| Q9D6Y9 |                                                 | 80.3  | 6.43 |
| Q8C8U0 |                                                 | 108.5 | 5.49 |
| Q8BFZ9 | cytoplasm; endoplasmic reticulum                | 37.8  | 5.5  |
| Q9WUM5 | mitochondria                                    | 36.1  | 9.39 |
| O35609 | Golgi apparatus                                 | 38.4  | 7.64 |
| Q99JR1 | mitochondria                                    | 35.6  | 9.23 |
| Q61771 | cytoplasm; cytoskeleton                         | 85.2  | 7.69 |
| Q9CQF9 | lysosomes                                       | 56.5  | 6.92 |
| Q9Z0J0 | extracellular; endoplasmic reticulum; lysosomes | 16.4  | 7.68 |
| Q8BLH7 | nucleus                                         | 65.2  | 7.84 |
| Q9D172 | mitochondria                                    | 28.1  | 8.78 |
| Q9D379 | endoplasmic reticulum                           | 52.5  | 8.35 |
| Q3TDN2 | cytoplasm; endoplasmic reticulum                | 52.4  | 5.47 |
| Q9ESW4 | mitochondria                                    | 46.9  | 8.4  |
| Q9D0S9 | cytoplasm; mitochondria                         | 17.3  | 9.82 |
| O08663 | cytoplasm                                       | 52.9  | 5.82 |
| Q64FW2 | endoplasmic reticulum                           | 67.3  | 8.95 |
| P52825 | nucleus; mitochondria                           | 73.9  | 8.37 |
| Q9DBS5 | cytoplasm; cytoskeleton                         | 68.6  | 6.09 |
| Q8R344 |                                                 | 18.9  | 7.21 |
| Q8BLF1 | cell membrane; endoplasmic reticulum            | 45.7  | 7.05 |
| P56391 | mitochondria                                    | 10.1  | 8.72 |
| Q08024 | nucleus                                         | 22    | 5.77 |
| A3KGF7 | cytoplasm; cell membrane; Golgi apparatus       | 134.5 | 6.01 |
| Q3V300 | cytoplasm; nucleus; cytoskeleton                | 73.1  | 9.25 |
| P10923 | extracellular                                   | 32.4  | 4.53 |
| Q7TMF3 | mitochondria                                    | 17.1  | 9.36 |
| P53395 | mitochondria                                    | 53.2  | 8.6  |
| Q9D0D4 | cytoplasm; nucleus; mitochondria; cytoskeleton  | 35.3  | 9.99 |
| Q9CYR0 | mitochondria                                    | 17.3  | 9.92 |
| Q8CDM1 | nucleus                                         | 117.9 | 6.89 |
| Q9CXE7 | endoplasmic reticulum; Golgi apparatus          | 26.2  | 4.93 |
| Q6NXI6 | nucleus                                         | 156.5 | 7.59 |



|        |                                                                                                |       |      |
|--------|------------------------------------------------------------------------------------------------|-------|------|
| Q80Y14 | mitochondria                                                                                   | 16.3  | 6.55 |
| P09581 | cell membrane; nucleus                                                                         | 109.1 | 6.21 |
| P30204 | cytoplasm; cell membrane                                                                       | 50.1  | 6.54 |
| Q9Z0R9 | endoplasmic reticulum                                                                          | 52.4  | 8.82 |
| Q9Z0H4 | cytoplasm; nucleus                                                                             | 54.2  | 8.76 |
| P04441 | cell membrane; extracellular;<br>nucleus; endoplasmic reticulum;<br>lysosomes; Golgi apparatus | 31.5  | 8.34 |
| Q3TVI8 | cytoplasm; nucleus; cytoskeleton                                                               | 81.1  | 5.36 |
| Q61425 | cytoplasm; nucleus;<br>mitochondria; cytoskeleton                                              | 34.4  | 8.65 |
| Q9CR62 | mitochondria                                                                                   | 34.1  | 9.94 |
| Q9CPV5 | nucleus                                                                                        | 23.1  | 5.26 |
| O88384 | lysosomes                                                                                      | 26.7  | 8.79 |
| Q8R4N0 | mitochondria                                                                                   | 37.5  | 8.54 |
| Q9D666 | cytoplasm; nucleus                                                                             | 101.9 | 6.81 |
| Q9QXE7 | nucleus                                                                                        | 56.8  | 5.72 |
| Q8R059 | cytoplasm                                                                                      | 38.2  | 6.74 |
| Q9CQC7 | nucleus; mitochondria                                                                          | 15.1  | 9.89 |
| P03975 |                                                                                                | 62.7  | 9.31 |
| Q9CQY5 | cell membrane; endoplasmic<br>reticulum                                                        | 37.9  | 9.76 |
| Q8CFE6 | cell membrane                                                                                  | 55.5  | 7.94 |
| Q9JHW4 | cytoplasm; nucleus;<br>mitochondria; cytoskeleton                                              | 63.5  | 8.29 |
| Q9ERR7 | endoplasmic reticulum                                                                          | 17.8  | 5.35 |
| Q99KB8 | cytoplasm; mitochondria                                                                        | 34.1  | 7.75 |
| P47740 | cytoplasm; endoplasmic reticulum                                                               | 53.9  | 8.35 |
| Q9CZA6 | cytoplasm; cytoskeleton                                                                        | 38.5  | 5.34 |
| Q8QZS1 | mitochondria                                                                                   | 43    | 8.06 |
| Q9QZS3 | cytoplasm; cell membrane;<br>nucleus                                                           | 70.8  | 8.65 |
| Q9CX56 | nucleus                                                                                        | 39.9  | 9.58 |
| Q9EPK6 | endoplasmic reticulum                                                                          | 52.4  | 5.27 |
| Q9R0Q4 | nucleus                                                                                        | 32.2  | 9.72 |
| P22315 | mitochondria                                                                                   | 47.1  | 8.91 |
| Q8K0C4 | cytoplasm                                                                                      | 56.7  | 8.41 |
| Q9D1C1 | cytoplasm; nucleus                                                                             | 19.6  | 7.33 |
| Q3ULF4 | mitochondria                                                                                   | 85.9  | 9.04 |
| Q8VEH8 | endoplasmic reticulum                                                                          | 54.9  | 6.25 |
| Q9Z1S0 | cytoplasm; nucleus                                                                             | 118.3 | 5.43 |
| Q9CQE1 | cytoplasm                                                                                      | 28.3  | 9.48 |
| Q8JZK9 | cytoplasm                                                                                      | 57.5  | 5.99 |

|        |                                                |       |       |
|--------|------------------------------------------------|-------|-------|
| P30412 | cytoplasm                                      | 22.8  | 7.5   |
| P09450 | nucleus                                        | 35.7  | 9.22  |
| Q9JHI5 | mitochondria                                   | 46.3  | 8.29  |
| Q91VC9 | mitochondria                                   | 37.3  | 9.8   |
| P21126 | cytoplasm; nucleus                             | 17.8  | 8.44  |
| Q8K009 | nucleus; mitochondria                          | 101.5 | 6.29  |
| Q64430 | cytoplasm; nucleus; Golgi apparatus            | 161.9 | 6.62  |
| E9Q1P8 | cytoplasm; nucleus                             | 59.3  | 8.69  |
| Q8BWW4 | cytoplasm                                      | 79.7  | 6.39  |
| Q9DB73 | cell membrane                                  | 34.1  | 8.87  |
| P48725 | cytoplasm; extracellular; cytoskeleton         | 329.3 | 5.36  |
| Q99JF5 | cytoplasm                                      | 44    | 6.3   |
| Q9QWF0 | nucleus                                        | 101.9 | 5.4   |
| Q9CQL7 | cytoplasm; nucleus                             | 14.2  | 4.73  |
| Q9D3P8 | cell membrane; mitochondria                    | 17.3  | 9.5   |
| Q9Z2G9 | cytoplasm; nucleus                             | 26.9  | 8.59  |
| P07607 | cytoplasm; nucleus; mitochondria               | 34.9  | 6.46  |
| Q00422 | nucleus                                        | 51.3  | 5     |
| Q99M54 | cytoplasm                                      | 28.7  | 5.81  |
| P97477 | cytoplasm; cytoskeleton                        | 44.7  | 9.38  |
| Q9CXX9 | cytoplasm; nucleus                             | 31.8  | 4.98  |
| Q8R164 | cytoplasm                                      | 32.8  | 8.94  |
| Q9CQV1 | mitochondria                                   | 13.8  | 9.64  |
| Q91XU3 | cytoplasm; nucleus; endoplasmic reticulum      | 47.3  | 6.89  |
| O08603 | cell membrane; extracellular                   | 28.6  | 9.07  |
| Q9Z1P6 | mitochondria                                   | 12.6  | 10.17 |
| Q99L13 | mitochondria                                   | 35.4  | 8.13  |
| Q9CQR4 | cytoplasm; nucleus; mitochondria; cytoskeleton | 15.2  | 8.82  |
| Q9D7P6 | mitochondria                                   | 18.1  | 9.29  |
| Q3TFK5 |                                                | 46.5  | 9.39  |
| P52482 | nucleus                                        | 21.3  | 8.53  |
| P49025 | cytoplasm; nucleus                             | 235.2 | 6.54  |
| Q8CHY6 | cytoplasm; nucleus                             | 67.3  | 9.89  |
| Q921J4 | nucleus                                        | 24.2  | 7.91  |
| Q8K021 | Golgi apparatus                                | 38    | 7.71  |
| P24288 | cytoplasm; mitochondria                        | 42.8  | 5.39  |
| Q9CWG8 | mitochondria                                   | 48.4  | 6.95  |
| O70126 | cytoplasm; nucleus; cytoskeleton               | 39.4  | 9.44  |
| Q80ZV0 | nucleus                                        | 34.7  | 9.45  |

|        |                                                               |       |      |
|--------|---------------------------------------------------------------|-------|------|
| Q80YP0 | nucleus                                                       | 33.9  | 9    |
| Q99KR7 | mitochondria                                                  | 21.7  | 9.16 |
| Q8C166 | cytoplasm; cell membrane;<br>nucleus                          | 58.8  | 5.66 |
| Q91XD7 |                                                               | 45.7  | 5.02 |
| Q8CHT0 | cytoplasm; mitochondria                                       | 61.8  | 8.24 |
| Q99LZ3 | cytoplasm; nucleus                                            | 25.9  | 5.24 |
| Q9CQW9 | cytoplasm; cell membrane;<br>lysosomes                        | 14.9  | 7.4  |
| Q8VE62 | cytoplasm                                                     | 45.7  | 4.55 |
| Q9D7B6 | mitochondria                                                  | 45    | 8.13 |
| Q05920 | mitochondria                                                  | 129.6 | 6.71 |
| O35604 | extracellular; nucleus; lysosomes;<br>Golgi apparatus         | 142.8 | 5.71 |
| Q91ZE0 | mitochondria                                                  | 49.6  | 8.25 |
| Q64442 | mitochondria                                                  | 38.2  | 7.02 |
| Q9DCZ4 | mitochondria; endoplasmic<br>reticulum; Golgi apparatus       | 22.6  | 9.25 |
| Q9CXR1 |                                                               | 38.1  | 8.32 |
| Q8JZU2 | mitochondria                                                  | 33.9  | 9.89 |
| Q61823 | cytoplasm; nucleus                                            | 51.7  | 5.16 |
| O35405 | nucleus; endoplasmic reticulum;<br>lysosomes; Golgi apparatus | 54.4  | 6.52 |
| Q03267 | cytoplasm; nucleus                                            | 57.3  | 6.52 |
| Q62086 | extracellular; nucleus;<br>mitochondria; lysosomes            | 39.6  | 5.83 |
| Q9QYR9 | mitochondria                                                  | 49.6  | 7.36 |
| Q3UVK0 | endoplasmic reticulum                                         | 100.1 | 7.49 |
| Q8R080 | cytoplasm; cytoskeleton                                       | 78.7  | 9.39 |
| Q9DBL1 | mitochondria                                                  | 47.8  | 7.87 |
| Q8K4F5 | mitochondria                                                  | 33.5  | 9.61 |
| Q8BR63 |                                                               | 23.6  | 4.59 |
| P24860 | cytoplasm; nucleus; cytoskeleton                              | 48    | 7.43 |
| Q9R1Z7 | cytoplasm; mitochondria                                       | 16.2  | 6.52 |
| Q05512 | cytoplasm; cell membrane;<br>cytoskeleton                     | 86.3  | 9.67 |
| Q61846 | cytoplasm; cell membrane                                      | 72.7  | 8.72 |
| Q8CFE2 | nucleus                                                       | 39.3  | 7.69 |
| Q8VBZ0 | extracellular                                                 | 35.9  | 8.09 |
| Q60780 | cytoplasm; cell membrane                                      | 48.1  | 7.83 |
| Q8VEB4 | extracellular; mitochondria;<br>lysosomes                     | 47.3  | 6.47 |
| Q9ERG0 | cytoplasm; cell membrane;                                     | 84    | 6.6  |

|        |                                                       |       |      |
|--------|-------------------------------------------------------|-------|------|
|        | cytoskeleton                                          |       |      |
| Q9JJ94 | cytoplasm; nucleus; cytoskeleton                      | 13.5  | 5.68 |
| Q9CQX4 | cytoplasm; nucleus                                    | 12    | 9.89 |
| Q60929 | nucleus                                               | 53.5  | 7.11 |
| Q9D6M3 | mitochondria                                          | 34.6  | 9.09 |
| Q91XE8 | cell membrane                                         | 21.2  | 9.42 |
| Q921Q3 | endoplasmic reticulum                                 | 54.4  | 8.37 |
| Q8BVK9 | nucleus                                               | 50.1  | 9.86 |
| Q8BHG9 | nucleus                                               | 18.8  | 8.95 |
| Q9JKF6 | cell membrane                                         | 57    | 6.35 |
| P61025 |                                                       | 9.7   | 8.94 |
| Q8BYI6 | cell membrane; endoplasmic reticulum; Golgi apparatus | 60.2  | 5.83 |
| Q9CYK1 | cell membrane; nucleus; mitochondria                  | 40.1  | 8.82 |
| P28741 | cytoplasm; cytoskeleton                               | 80.1  | 6.54 |
| P31651 | cell membrane                                         | 69.6  | 7.17 |
| Q9CQE7 | endoplasmic reticulum; Golgi apparatus                | 43.2  | 6.47 |
| Q8BZR9 | cytoplasm; nucleus                                    | 70    | 5.8  |
| Q8BXN9 | cytoplasm; Golgi apparatus                            | 63.3  | 6.67 |
| Q8BUE4 | cytoplasm; cell membrane; nucleus; mitochondria       | 40.6  | 8.98 |
| Q64281 | cell membrane                                         | 37.5  | 6.21 |
| P19221 | extracellular                                         | 70.2  | 6.43 |
| Q9EQ06 | cytoplasm; endoplasmic reticulum                      | 32.9  | 8.66 |
| Q9CQS5 | cytoplasm; nucleus                                    | 62.5  | 6.43 |
| Q8K1Z0 | mitochondria                                          | 35.1  | 5.92 |
| Q99N84 | nucleus; mitochondria                                 | 28.7  | 8.35 |
| Q8CCH2 |                                                       | 38.2  | 6.23 |
| Q9DAS9 | cell membrane                                         | 8     | 8.97 |
| Q61048 | nucleus                                               | 42.1  | 7.36 |
| Q8K0Z7 | mitochondria                                          | 32.3  | 8.12 |
| A2AWP8 | cytoplasm                                             | 139.9 | 5.82 |
| Q3V1H1 | cytoplasm; cytoskeleton                               | 74    | 9.23 |
| Q9WVM1 | cytoplasm; cell membrane; nucleus; cytoskeleton       | 70.1  | 8.51 |
| Q31125 | nucleus; endoplasmic reticulum; Golgi apparatus       | 50.6  | 6.87 |
| P43883 | cytoplasm; nucleus                                    | 46.6  | 6.87 |
| Q8R1G6 | cytoplasm; cytoskeleton                               | 37.7  | 8.7  |
| Q9Z2Z6 | mitochondria                                          | 33    | 9.11 |
| Q3UDF0 | lysosomes                                             | 54.4  | 8.32 |

|        |                                                                                      |       |       |
|--------|--------------------------------------------------------------------------------------|-------|-------|
| Q9CPQ1 | mitochondria                                                                         | 8.5   | 10.14 |
| Q80WR5 | nucleus                                                                              | 24.8  | 6.04  |
| Q9CQ88 | cell membrane                                                                        | 22.7  | 8.44  |
| Q922H2 | nucleus; mitochondria                                                                | 47.9  | 8.82  |
| Q9WUZ9 | cell membrane; extracellular;<br>endoplasmic reticulum                               | 47.1  | 5.29  |
| Q9D600 | nucleus                                                                              | 21.2  | 5.29  |
| Q91WK1 | nucleus; mitochondria                                                                | 23.3  | 9.45  |
| Q9R1S3 | cell membrane; endoplasmic<br>reticulum                                              | 105   | 7.58  |
| O35386 | mitochondria                                                                         | 38.6  | 7.53  |
| Q9D6K5 | cytoplasm; mitochondria                                                              | 15.8  | 6.3   |
| Q8BH79 | cell membrane                                                                        | 76.1  | 6.7   |
| Q9CQ18 | nucleus                                                                              | 17.8  | 5.8   |
| O35598 | cytoplasm; cell membrane;<br>nucleus; Golgi apparatus                                | 83.9  | 7.94  |
| Q9CRA5 | cytoplasm; cell membrane;<br>mitochondria; Golgi apparatus                           | 33.7  | 6.44  |
| Q99J27 | endoplasmic reticulum                                                                | 61    | 8.16  |
| Q8C263 | cytoplasm; cytoskeleton                                                              | 45.3  | 5.26  |
| P50171 | mitochondria                                                                         | 26.6  | 6.54  |
| P0C6B7 |                                                                                      | 26.3  | 8.73  |
| Q9D2R6 | mitochondria                                                                         | 12    | 9.86  |
| Q9ER41 | nucleus; endoplasmic reticulum                                                       | 37.8  | 8.02  |
| Q9DCC8 | mitochondria                                                                         | 16.3  | 8.6   |
| P11881 | cytoplasm; endoplasmic reticulum                                                     | 313   | 6.04  |
| Q80TN4 |                                                                                      | 89.1  | 7.55  |
| Q6PG16 | nucleus; mitochondria                                                                | 74.2  | 9.35  |
| O55126 | cytoplasm; mitochondria                                                              | 32.9  | 9.26  |
| O55125 | mitochondria                                                                         | 33.3  | 9.44  |
| Q811J3 | cytoplasm; mitochondria;<br>endoplasmic reticulum; Golgi<br>apparatus                | 104.9 | 6.93  |
| P0DOV2 | cytoplasm; nucleus                                                                   | 69.4  | 8.69  |
| Q61703 | extracellular                                                                        | 105.9 | 7.27  |
| Q9D3B1 | endoplasmic reticulum                                                                | 28.4  | 9.58  |
| Q6RUT7 |                                                                                      | 15.3  | 4.93  |
| P61804 | endoplasmic reticulum                                                                | 12.5  | 7.08  |
| Q91WA1 | cytoplasm; nucleus                                                                   | 31.5  | 4.82  |
| Q9D975 | cytoplasm                                                                            | 14.1  | 8.02  |
| P12023 | cytoplasm; cell membrane;<br>extracellular; nucleus;<br>endoplasmic reticulum; Golgi | 86.7  | 4.79  |

|        |                                 |       |       |
|--------|---------------------------------|-------|-------|
|        | apparatus                       |       |       |
| Q3UA16 | nucleus                         | 26.4  | 6.95  |
| B2RWS6 | cytoplasm; nucleus              | 263.1 | 8.54  |
| P56390 |                                 | 9.9   | 8.46  |
| Q8BFY7 | nucleus                         | 25.7  | 10.92 |
|        | cell membrane; nucleus; Golgi   |       |       |
| Q62313 | apparatus                       | 37.8  | 5.34  |
| Q8C6I2 | cytoplasm; mitochondria         | 19.4  | 6.35  |
| O35955 | cytoplasm;nucleus               | 29    | 6.87  |
| Q3URE1 |                                 | 65    | 8.02  |
| Q9CZL5 | nucleus; mitochondria           | 14.8  | 9.16  |
| Q8R0F8 | cytoplasm; mitochondria         | 25.2  | 7.69  |
| A1L314 | cytoplasm                       | 78.3  | 5.92  |
| O35316 | cell membrane                   | 69.8  | 7.23  |
|        | nucleus; mitochondria;          |       |       |
| O55003 | endoplasmic reticulum           | 21    | 7.14  |
| Q8VC04 | cell membrane                   | 29.1  | 7.44  |
| P15702 | extracellular;nucleus           | 40    | 4.96  |
| Q8K370 | mitochondria                    | 118.9 | 8.24  |
| Q8CIM3 | mitochondria                    | 58.5  | 7.37  |
|        | cytoplasm; mitochondria;        |       |       |
| Q08297 | cytoskeleton                    | 36.9  | 5.6   |
| Q8C0L8 | cytoplasm; Golgi apparatus      | 91.3  | 6.27  |
| Q9D6V8 | cytoplasm                       | 14.7  | 4.12  |
| P43024 | mitochondria                    | 12.3  | 9.98  |
| P36371 | endoplasmic reticulum           | 77.4  | 7.24  |
| Q9DCA2 | mitochondria                    | 20.2  | 10.77 |
| E9Q5F9 | nucleus                         | 285.5 | 6.3   |
| Q91ZW2 | endoplasmic reticulum           | 44.7  | 8.41  |
| Q9D9Z1 | cytoplasm;nucleus; cytoskeleton | 34.7  | 5.2   |
| Q9CR10 | mitochondria                    | 22.2  | 8.05  |
| Q9CYW4 | nucleus; mitochondria           | 28    | 6.8   |
| Q922B1 | nucleus; mitochondria           | 35.3  | 8.85  |
|        | extracellular;nucleus;          |       |       |
| Q3V1T4 | endoplasmic reticulum           | 83.6  | 5.14  |
| Q9CR86 | cytoplasm                       | 16.1  | 8.21  |
|        | cytoplasm; cell membrane;       |       |       |
| Q3UUI3 | mitochondria                    | 26    | 9.64  |
| Q9D023 | mitochondria                    | 14.3  | 10.61 |
| Q91VE0 | endoplasmic reticulum           | 72.3  | 8.59  |
| Q7TMF2 | cytoplasm;nucleus               | 39.5  | 8.31  |
| P47930 | nucleus                         | 35.3  | 7.49  |
| Q9WTX2 | nucleus                         | 34.3  | 8.43  |

|        |                                                    |       |      |
|--------|----------------------------------------------------|-------|------|
| O70201 | cytoplasm;nucleus; cytoskeleton                    | 16.3  | 5.6  |
| Q3UDW8 | lysosomes                                          | 72.5  | 8.27 |
| Q9CZI9 | nucleus                                            | 37.3  | 8.75 |
| P63030 | mitochondria                                       | 12.4  | 9.61 |
| Q7TSY8 | nucleus                                            | 130.2 | 8.76 |
| P22518 | cytoplasm;nucleus                                  | 57.1  | 8.94 |
| Q9ERH4 | cytoplasm;nucleus; cytoskeleton                    | 48.5  | 9.89 |
| Q3U2A8 | cytoplasm; mitochondria                            | 118.4 | 7.14 |
| Q9CZN8 | mitochondria                                       | 56.7  | 5.95 |
| Q8CFV9 | cytoplasm; mitochondria                            | 17.4  | 7.55 |
| Q3UHH1 | cytoplasm                                          | 196.9 | 6.84 |
| P97783 | cytoplasm;nucleus; cytoskeleton                    | 10    | 4.41 |
| Q9CR46 | cytoplasm; cytoskeleton                            | 13.7  | 5.55 |
| Q8C0L0 | nucleus                                            | 37.1  | 4.37 |
| Q9CXY9 | endoplasmic reticulum                              | 44.9  | 6.54 |
| Q8VD57 | cell membrane                                      | 17.5  | 9.09 |
| Q8BH51 | mitochondria                                       | 6.4   | 9.79 |
| Q9D0P0 | endoplasmic reticulum                              | 23.3  | 6.89 |
| Q00623 | extracellular                                      | 30.6  | 5.73 |
| Q99MK9 | cytoplasm;nucleus; cytoskeleton                    | 38.8  | 9.04 |
| P51943 | cytoplasm;nucleus                                  | 47.2  | 6.21 |
| Q8CAK1 | mitochondria                                       | 38.4  | 9.01 |
| Q8BHD8 | cytoplasm                                          | 40.7  | 6.46 |
| Q8BJ56 | cell membrane                                      | 53.6  | 6.46 |
| B1B212 | cell membrane; extracellular                       | 28.2  | 7.71 |
| Q3TC33 |                                                    | 30.5  | 9.13 |
| Q9CX66 | nucleus                                            | 20    | 4.84 |
| Q9DAC7 |                                                    | 16.8  | 5.4  |
| Q8VDV3 |                                                    | 42.7  | 6.38 |
| Q9CRY7 | cytoplasm; endoplasmic reticulum                   | 35.8  | 8.31 |
| Q3UMR5 | mitochondria                                       | 39.7  | 8.56 |
| Q61070 | nucleus; endoplasmic reticulum;<br>Golgi apparatus | 38.9  | 9.72 |
| Q9JKK7 | cytoplasm; cytoskeleton                            | 39.5  | 5.35 |
| Q9Z1X9 | nucleus                                            | 65.3  | 5.43 |
| Q8BG21 |                                                    | 18.3  | 5.44 |
| P98197 | cell membrane;nucleus;<br>endoplasmic reticulum    | 135.4 | 6.48 |
| Q91V16 | mitochondria                                       | 10.4  | 9.73 |
| A2A559 | endoplasmic reticulum; Golgi<br>apparatus          | 36.5  | 7.94 |
| Q9Z1T6 | cytoplasm                                          | 236.7 | 6.68 |
| Q9DCI3 | nucleus                                            | 26.8  | 5.02 |

|        |                                           |       |      |
|--------|-------------------------------------------|-------|------|
| Q5NCE8 | mitochondria                              | 49.3  | 7.53 |
| O88939 | cytoplasm;nucleus                         | 60.2  | 5.12 |
| Q9CQ00 | mitochondria                              | 11.3  | 9.39 |
| Q9D818 | cell membrane;nucleus                     | 42.8  | 8.63 |
| Q14CH7 | mitochondria                              | 106.7 | 6.18 |
| Q60611 | nucleus                                   | 85.8  | 6.54 |
| Q920Q8 | cytoplasm;nucleus; cytoskeleton           | 71.5  | 5.47 |
| Q9DBH0 | extracellular;nucleus                     | 98.7  | 7.11 |
| O09126 | cell membrane; extracellular              | 95.6  | 7.81 |
| Q8BZ36 | cytoplasm; endoplasmic reticulum          | 90    | 5.14 |
| Q99PL7 | endoplasmic reticulum                     | 41.4  | 8.94 |
| Q01339 | cytoplasm; extracellular                  | 38.6  | 8.22 |
| P60603 | mitochondria                              | 8.2   | 9.33 |
| Q8K2T4 | cytoplasm;nucleus; mitochondria           | 9.6   | 9.52 |
| Q9JKY5 | cytoplasm; cell membrane;<br>mitochondria | 119.4 | 6.52 |

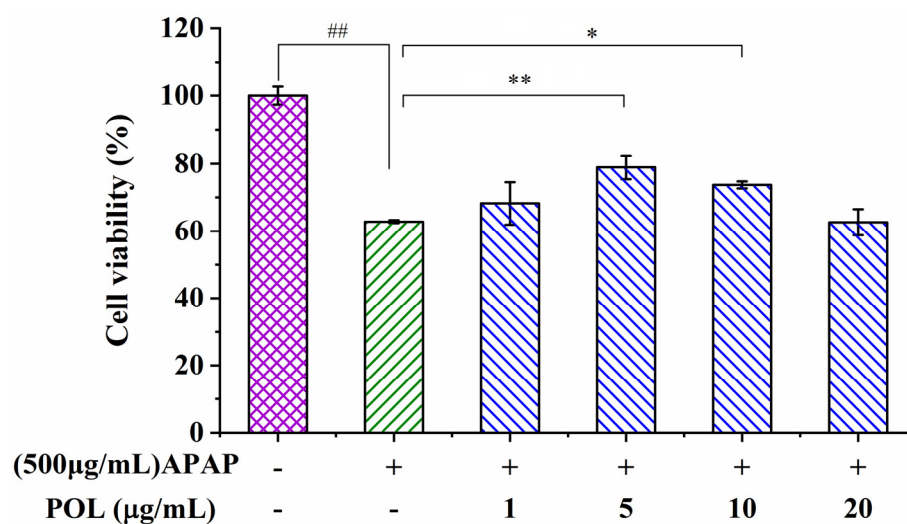

**Figure S1 MTT assay for cell viability.** Effect of acetaminophen (APAP) and polydatin on the survival rate of RAW264.7 cells.



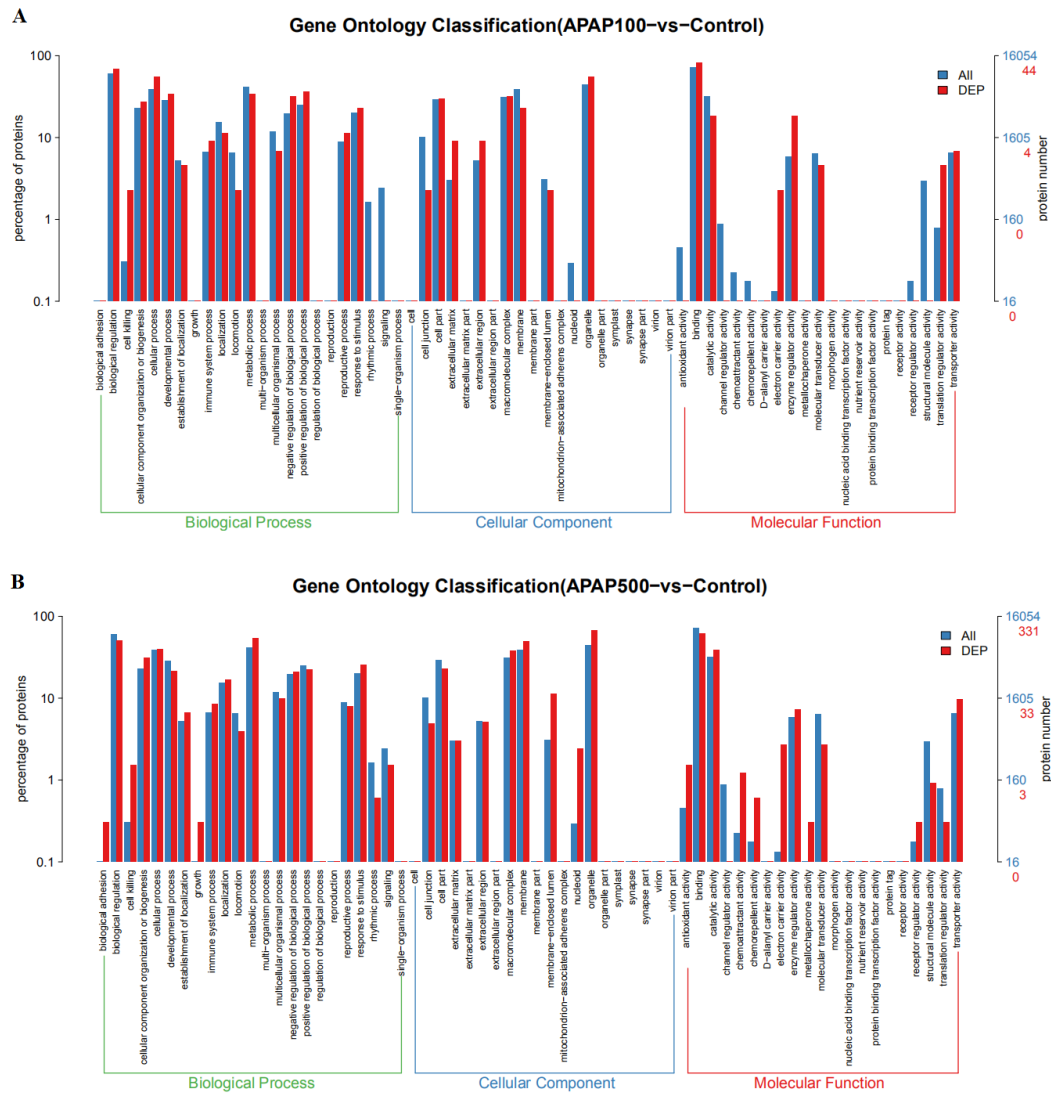

**Figure S2** Gene ontology classification (ANOVA) analysis of differentially expressed proteins of macrophages treated with acetaminophen (APAP). (A) APAP100 vs control group, (B) APAP500 vs control group.
